# Supplementary material for: Engineered Ribosyl-1-Kinase Enables Concise Synthesis of Molnupiravir, an Antiviral for COVID-19
Source: PubMed Central journal article supplement — ACS Cent Sci. 2021 Oct 29;7(12):1980–5. doi: 10.1021/acscentsci.1c00608 (PMC8704035; doi:10.1021/acscentsci.1c00608), 2021-10-29
Supplement: oc1c00608_si_001.pdf [file oc1c00608_si_001.pdf]

## Supporting Information

# Engineered Ribosyl-1-Kinase Enables Concise Synthesis of Molnupiravir, an Antiviral for COVID-19

John A. McIntosh<sup>1\*</sup>, Tamas Benkovics<sup>1</sup>, Steven M. Silverman<sup>1</sup>, Mark A. Huffman<sup>1</sup>, Jongrock Kong<sup>1</sup>, Peter E. Maligres<sup>1</sup>, Tetsuji Itoh<sup>1</sup>, Hao Yang<sup>1</sup>, Deeptak Verma<sup>1</sup>, Weilan Pan<sup>1</sup>, Hsing-I Ho<sup>1</sup>, Jonathan Vroom<sup>2</sup>, Anders Knight<sup>2</sup>, Jessica Hurtak<sup>2</sup>, Artis Klapars<sup>1</sup>, Anna Fryszkowska<sup>1</sup>, William J. Morris<sup>1</sup>, Neil A. Strotman<sup>1</sup>, Grant S. Murphy<sup>1</sup>, Kevin M. Maloney<sup>1</sup>, Patrick S. Fier<sup>1\*</sup>

\*E-mail: [john.mcintosh1@merck.com](mailto:john.mcintosh1@merck.com), [patrick.fier@merck.com](mailto:patrick.fier@merck.com)

### Abbreviations

AcK – Acetate Kinase

ATP – adenosine 5'-triphosphate

LCAP – Liquid chromatography area percent

MTR kinase – S-methyl-5-thioribose kinase

NNK, NNN, NNS – degenerate codons

PCR – polymerase chain reaction

PO – Pyruvate oxidase

SFP – shake flask powder = lyophilized powder of cell-free extract of enzyme

SSM – site-saturation mutagenesis

SUP – Sucrose Phosphorylase

TEoA – triethanolamine

UP – Uridine Phosphorylase

### General experimental details

Reagents and solvents were purchased from commercial suppliers and used as received. All reactions were carried out in a fume hood without special precautions towards air or moisture. NMR chemical shifts are reported in ppm and referenced to residual solvent peaks. Coupling constants are reported in hertz.

### Enzyme discovery

A panel of enzyme homologs is screened to discover the most suitable enzyme for evolution. The panel design step is performed computationally for each enzyme family or class via homology search and filtering techniques. To be specific, thousands of homolog sequences are collected and aligned through BLAST search from publicly available protein databases, such as UniProt, GenBank of NCBI or the PDB. This step is followed by a phylogenetic tree construction step to allow systematic selection of the most diverse members in the evolutionary space, using the appropriate thresholds on phylogenetic sub-group size and all-to-all sequence identity. Other filtering criteria such as literature data, structure availability, are additional constraints used to reduce the number of enzymes to be evaluated experimentally. The above computational steps were carried out using 3DM database panel design toolbox<sup>1</sup>.

### Library design for enzyme evolution

Each round of evolution consisted of multiple libraries, including both site-saturation mutagenesis libraries and combinatorial mutagenesis libraries. Three main strategies were employed to select residues targeted for mutagenesis: (i) sequence-based library design: for an enzyme target, a diverse set of homolog sequences was collected, aligned, and conservation scores of each amino acid at each position were calculated. A conservation threshold was applied to filter amino acids as prospective mutations for experimental evaluation. (ii) Structure-based library design: homology models of each enzyme target were prepared with docked substrates, followed by an *in-silico* mutation analysis to identify the best mutable sites and the best amino acid changes at those positions for evaluation. Structure-based design and visualization tools such as Schrodinger<sup>2</sup> and Pymol<sup>3</sup> were employed for this technique. (iii) Data-driven library design: improved variants from both site-saturation and combinatorial mutagenesis libraries were sequenced in each evolution round to identify specific mutations. Machine learning-based random forest model (using a 3DM deconvolution toolbox)<sup>1</sup> was constructed to triage the beneficial effect of each mutation and guide the combinatorial design in subsequent evolution rounds.

### Library construction for directed evolution

For the enzymes reported in the literature, the wild-type variants were codon-optimized for expression in *E. coli* and synthesized and cloned by GenScript into the pET vector system. The uridine phosphorylase (UP) enzyme used as a starting point for evolution was obtained from the *E. coli* genome and cloned into the expression vector pCK900 through restriction enzyme digest. *E. coli* W3110 or BL21(DE3) cells were transformed with the plasmids of interest.

The site-saturation mutagenesis (SSM) libraries<sup>4,5</sup> used degenerate oligos (e.g. NNK, NNS, NNN), introducing mutations through overlap extension PCR. Combinatorial libraries (defined as libraries that were composed of multiple mutations that were recombined to generate variants with several mutations) were produced using standard mutagenesis methods using polymerase chain reaction (PCR). Electrocompetent *E. coli* W3110 or BL21(DE3) cells were transformed with the constructed libraries and plated on LB-agar plates with antibiotic selection, yielding variants as individual colonies.

### MTR kinase expression for screening

The 5-S-methylthioribose (MTR) kinase enzyme used as a starting point for evolution was obtained as a codon-optimized gene based on the wild-type protein sequence for the MTR kinase from *Klebsiella spp.* and was cloned into pET30 via NdeI/XhoI restriction sites. The plasmid containing the wild-type MTR kinase was transformed into electrocompetent *Escherichia coli* BL21(DE3) via electroporation. Following a 1 hour outgrowth at 37°C, a portion of the transformation was plated on LB-agar supplemented with 50 micrograms per mL kanamycin and 1 % (w/v) glucose. Colonies were picked and inoculated into a 96-well plate containing 0.2 mL per well of LB Broth (culture media for cells) supplemented with 50 micrograms per mL of kanamycin and 1 % (w/v) glucose. The 96-well plate was shaken at 250 RPM / 30°C overnight. The following day, 0.01 mL per well of culture from each well was used to inoculate the corresponding well of a new 96-well plate containing 0.39 mL per well of ZYM-5052 medium. This culture was grown at 30 °C/250 RPM for 18 hours after which time the cells were pelleted by centrifugation and the supernatants were discarded. After centrifugation, cells were frozen, thawed, and then resuspended in lysis buffer (0.2 mL per well of 50 mM triethanolamine (TEoA)-HCl pH 7.5, 1 mg/mL lysozyme, 0.5 mg/mL polymyxin B sulfate, 1U/mL DnaseI, and 1 mM MgSO<sub>4</sub>). The plate was then shaken for 2 h at room temperature at 1200 RPM. The lysate was then clarified by centrifugation (4000 x g, 10 minutes). The supernatant following this step was then used in subsequent well-plate reactions.

### MTR kinase expression in shake-flasks

A single colony containing the MTR kinase gene was inoculated into a 125 mL flask containing 50 mL of LB broth supplemented with 50 micrograms per mL of kanamycin and 1 % (w/v) glucose. The flask was shaken at 250 RPM / 30°C overnight. The following day, a 2.8 L flask containing 1 L of ZYM-5052 medium was inoculated with a 100-fold dilution of the saturated overnight culture. This culture was grown at 30°C/250 RPM for 18 hours after which time the cells were harvested by centrifugation. After centrifugation, cells were resuspended to a concentration of 0.33 grams of 1 mL of aqueous 50 mM TEoA-HCl buffer pH 7.5. This suspension was shaken at 20°C for 30 minutes, after which time the cells were placed on ice to chill, and then disrupted by high-pressure homogenization (16,000 PSI). The resulting lysate was then clarified by centrifuging at 10,000 x g for 30 minutes. Following centrifugation, the supernatant was frozen and lyophilized.

### MTR kinase screening reactions with wild-type enzymes

Reactions were assembled containing tris buffer (100 mM, pH 8.0), potassium chloride (100 mM), 5'-isobutyrylribose (10 mM), ATP (0.4 eq.), magnesium sulfate (1 eq.), propionyl phosphate (4.5 eq.), uracil (5.3 eq.), sucrose (6.7 eq.), acetate kinase (1 g/L, ACK-101, Codexis, Inc.), wild-type *E. coli* uridine phosphorylase (1 g/L), and sucrose phosphorylase (1 g/L, SUP-101, Codexis, Inc.) and initiated via addition of clarified lysate containing overexpressed MTR kinase (10 vol%). Reactions were sampled at 1h and 3h and analyzed by injection onto an Xbridge Glycan BEH Amide column (4.6 x 150 mm, Waters, 186007275) and eluted on the following gradient:

Sample diluent: 50/50 water/AcN

A: 0.1% TFA in water

B: 0.1% TFA in acetonitrile

1.25 mL/min, 25 C column temperature

Detection by UV at 254 nm with 4 nm bandwidth

Gradient:

| Time (min) | % B |
|------------|-----|
| 0.0        | 95  |
| 5.5        | 65  |
| 5.6        | 20  |
| 7.6        | 20  |
| 7.7        | 95  |

Re-equilibrate at initial conditions for 2.0 min

#### MTR kinase directed evolution screening

Reactions were assembled as indicated in Table S1. Following reaction, samples were quenched via dilution into 50/50 water/acetonitrile and then spin filtered. Samples were then analyzed by injection onto an Acquity BEH Amide (2.1 x 50 mm, Waters, 186004800) and eluted on the following gradient:

A: 2 mM ammonium formate pH 8.5 in 90:10 acetonitrile:water

B: none (isocratic)

0.6 mL/min, 45 C column temperature

Detection by UV at 210 nm with 4 nm bandwidth

Gradient: 0.6 mL/min

| Time (min) | % A |
|------------|-----|
| 0.0        | 100 |
| 1.0        | 100 |

#### Enzyme Preparation for vial and larger-scale reactions

MTR kinase clones were inoculated into a 125 mL flask containing 50 mL of LB Broth supplemented with 50 micrograms per mL of kanamycin and 1 % (w/v) glucose. The flask was shaken at 250 RPM / 30°C overnight. The following day, a 2.8 L flask containing 1 L of ZYM-5052 medium was inoculated with a 100-fold dilution of the saturated overnight culture. This culture was grown at 30 °C/250 RPM for 18 hours after which time the cells were harvested by centrifugation. After centrifugation, cells were resuspended to a concentration of 0.33 grams of 1 mL of aqueous 50 mM TEoA-HCl buffer pH 7.5. This suspension was shaken at 20°C for 30 minutes, after which time the cells were placed on ice to chill, and then disrupted by high-pressure homogenization (16,000 PSI). The resulting lysate was then clarified by centrifuging at 10,000 x g for 30 minutes. Following centrifugation, the supernatant was frozen and lyophilized.

#### Uridine phosphorylase expression for screening

*E. coli* cells containing recombinant UP-encoding genes from monoclonal colonies were inoculated into 180 µL LB containing 1% glucose and 30 µg/mL chloramphenicol in the wells of 96-well shallow-well microtiter plates. The plates were sealed with O<sub>2</sub>-permeable seals and cultures were grown overnight at 30 °C, 200 rpm, and 85% humidity. Then, 10 µL of each of the cell cultures were transferred into the wells of 96-well deep-well plates containing 390 µL TB and 30 µg/mL CAM. The deep-well plates were sealed with O<sub>2</sub>-permeable seals and incubated at 30 °C, 250 rpm, and 85% humidity until OD<sub>600</sub> 0.6-0.8 was reached. The cell cultures were then induced by IPTG to a final concentration of 1 mM and incubated overnight at 30 °C. The cells were then pelleted using centrifugation at 4000 rpm for 10 min. The supernates were discarded and the pellets frozen at -80°C prior to lysis.

For lysis, 400  $\mu$ L lysis buffer containing 50 mM TEOA buffer, pH 7.5, 1 g/L lysozyme, and 0.5 g/L polymyxin b sulfate (PMBS) was added to the cell paste in each well. The cells were lysed at room temperature for 2 hours with shaking on a bench top shaker. The plate was then centrifuged for 15 min at 4000 rpm and 4 °C. The clear supernates were then used in biocatalytic reactions to determine their activity levels.

#### Uridine phosphorylase expression in shake-flasks

Selected HTP cultures grown as described above were plated onto LB agar plates with 1% glucose and 30  $\mu$ g/mL chloramphenicol, and grown overnight at 37 °C. A single colony from each culture was transferred to 6 mL LB with 1% glucose and 30  $\mu$ g/ml chloramphenicol. The cultures were grown for 18 h at 30 °C, 250 rpm, and subcultured approximately 1:50 into 250 mL of TB containing 30  $\mu$ g/mL chloramphenicol, to a final OD600 of 0.05. The cultures were grown for approximately 195 minutes at 30 °C, 250 rpm, to an OD600 between 0.6-0.8 and induced with 1 mM IPTG. The cultures were then grown for 20 h at 30 °C, 250 rpm. The cultures were centrifuged 4000 rpm x 20 min. The supernate was discarded, and the pellets were resuspended in 30 mL of 20 mM TEOA, pH 7.5, and lysed using a Microfluidizer® processor system (Microfluidics) at 18,000 psi. The lysates were pelleted (10,000 rpm x 60 min) and the supernates were frozen and lyophilized to generate shake-flask enzyme powders (SFP).

#### Pyruvate oxidase

The pyruvate oxidase genes from *Aerococcus urinaeequi* (PO3), *Streptococcus sanguinis* (PO5), and *Weisella confusa* (PO6) were codon-optimized for *E. coli* and cloned into pET28 in-frame with the N-terminal his-tag. The enzymes were expressed at Prozomix Ltd, UK.

**Figure S1. Uridine phosphorylase screening**

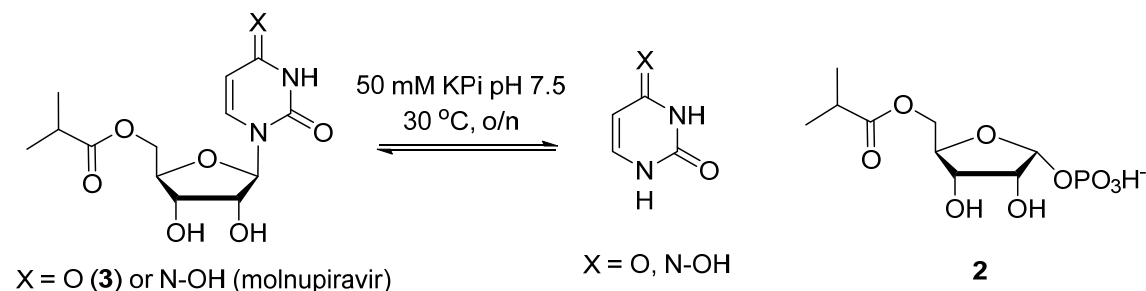

|                                 | LCAP N-OH<br>cytosine | LCAP<br>uracil |
|---------------------------------|-----------------------|----------------|
| Macaca mulatta MTAP             | 0.4                   | 3.0            |
| Saccharolobus solfataricus MTAP | 0.3                   | 2.8            |
| Mus musculus MTAP               | 0.2                   | 2.6            |
| Trichomona vaginalis PNP        | 0.3                   | 3.3            |
| Plasmodium falciparum PNP       | 0.5                   | 4.0            |
| Escherichia coli TP             | 0.4                   | 2.5            |
| Rattus norvegicus MTAP          | 0.5                   | 3.3            |
| Aeropyrum pernix MTAP           | 0.3                   | 2.9            |
| Pyrococcus furiosus MTAP        | 0.4                   | 3.6            |
| Saccharomyces solfataricus PNP  | 0.3                   | 2.7            |
| Plasmodium voelii               | 0.4                   | 2.7            |
| Homo sapiens TP                 | 0.0                   | 2.5            |
| <b>Escherichia coli UP</b>      | <b>2.1</b>            | <b>42.6</b>    |
| Homo sapiens UP                 | 0.4                   | 2.4            |
| Schistosoma mansoni UP          | 0.5                   | 2.9            |
| Deinococcus geothermalis PNP    | 0.6                   | 2.8            |
| Bacillaceae sp. PNP             | 0.4                   | 1.9            |

MTAP = S-methylthioadenosine phosphorylase

TP = thymidine phosphorylase

UP = uridine phosphorylase

PNP = purine nucleoside phosphorylase

LCAP = liquid chromatography area percent

Note: DNA sequences of nucleoside phosphorylases tested provided at the end of the Supporting Information

**Procedure:** A panel of uridine phosphorylase enzymes screened for phosphorolytic activity against 5'-isobutyryluridine or molnupiravir (8 mg/mL, final concentration) in the presence of potassium phosphate buffer (50 mM, pH 7.5). Reactions were shaken overnight (30 °C, 1000 RPM). The following day, reactions were sampled and analyzed by injection onto an Xbridge Glycan BEH Amide column (4.6 x 150 mm, Waters, 186007275) and eluted on the following gradient:

A: 0.1% TFA in water

B: 0.1% TFA in acetonitrile

1.25 mL/min, 25 C column temperature

Detection by UV at 254 nm with 4 nm bandwidth

Gradient:

| Time (min) | % B |
|------------|-----|
|------------|-----|

|     |    |
|-----|----|
| 0.0 | 95 |
| 5.5 | 65 |
| 5.6 | 20 |
| 7.6 | 20 |
| 7.7 | 96 |

Re-equilibrate at initial conditions for 2.0 min

**Fig. S2. Selective 5-acylation of ribose with *O*-isobutyryl acetone oxime**

**Screening conditions**

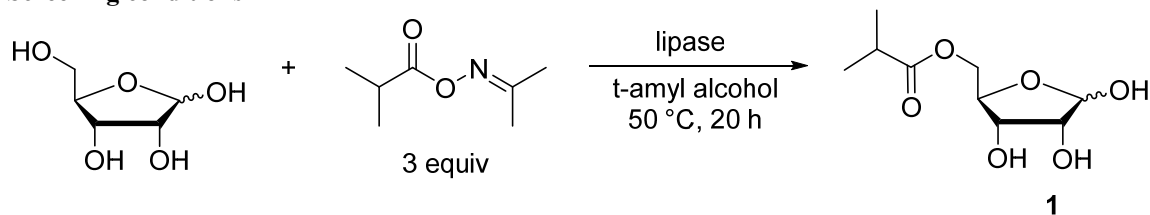

| Enzyme Name                                         | 5-isobutyryl ribose assay yield% |
|-----------------------------------------------------|----------------------------------|
| Novozym 435 (Candida antarctica lipase B)           | 65                               |
| IMMTLL-T2-150 (Thermomyces lanuginosus lipase)      | 40                               |
| IMMRES-T2-150 (Resinase HT lipase)                  | 38                               |
| IMMLIPX-T2-150 (Lipex 100 L lipase)                 | 56                               |
| IMML51-T2-150 (Novozymes 51032)                     | 61                               |
| IMMP6-T2-250 (protease from Bacillus licheniformis) | 11                               |
| Lipozyme RM IM                                      | 10                               |
| CDX IMB-103                                         | 33                               |

Condition: 10 g/L D-ribose, 10 g/L lipase, 28.6 g/L propane-2-one *O*-isobutyryl oxime, t-amyl alcohol, 50 C, 20 hr

Lipase screening procedure: to a 1-mL glass vial was charged D-ribose (6 mg), lipase (6 mg), propane-2-one *O*-isobutyryl oxime (17.2 mg), and t-amyl alcohol (0.6 mL). The plate was sealed and shaken at 50 °C, 600 RPM for 20 hr. 20 µL of the reaction mixture was taken and diluted with 180 µL 50/50 (v/v) acetonitrile: water for UPLC-CAD analysis. The assay yield was determined using a calibration curve for 5-isobutyryl ribose.

**Fig. S3. Selective 5-acylation of ribose with isobutyric anhydride**

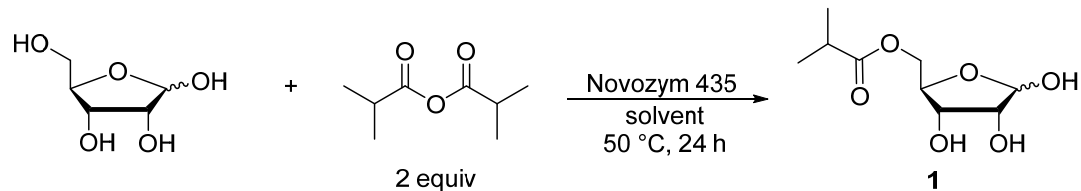

| Entry | Solvent | Novozym 435 (wt%) | Conversion (%) | Yield (%) |
|-------|---------|-------------------|----------------|-----------|
| 1     | EtOH    | 50                | 0              | N/A       |
| 2     | iPrOH   | 50                | 8              | N/A       |
| 3     | tBuOH   | 50                | 98             | N/A       |
| 4     | THF     | 50                | 47             | N/A       |
| 5     | Acetone | 50                | 99             | N/A       |
| 6     | tBuOH   | 20                | 86             | 79        |
| 7     | Acetone | 20                | 99             | 94        |
| 8     | Acetone | 10                | 99             | 94        |

Novozym 435 screening procedure:

In a vial was added ribose, Novozym 435, solvent, and isobutyric anhydride. The mixture was aged at 50°C for 24 h, and the conversion was determined with a calibrated UPLC-CAD instrument. The assay yield was measured after dissolving the reaction mixture in aqueous acetonitrile and measuring the product absorbance value on a calibrated UPLC-CAD instrument.

UPLC-CAD analysis was performed using Agilent 1290 instrument equipped with a Corona Ultra RS detector by Dionex or Corona Veo R by Thermo Scientific as described below.

Column: Waters XBridge C18 4.6 x 50 mm, 2.5 μm particles

Column Temperature: 40 °C

Flow Rate: 2.000 mL/min

Detector: CAD, 35 °C

Diluent: 50:50 v/v Water:Acetonitrile

Mobile phase A: 20 mM TEAA in Water

Mobile phase B: 20 mM TEAA in Acetonitrile

Injection Volume: 5 μL

Gradient: 10%-15% B (0-1.0 min), 15%-90% B (1.0-1.5 min), 90% B (1.5-3.0 min), 90-10% B (3.0-3.1 min), 10% B (3.1-4.0 min).



**Figure S4. Natural versus desired reactivity of MTR kinases**

Natural pathway for methionine recycling (MTR kinase natural reaction reaction highlighted):

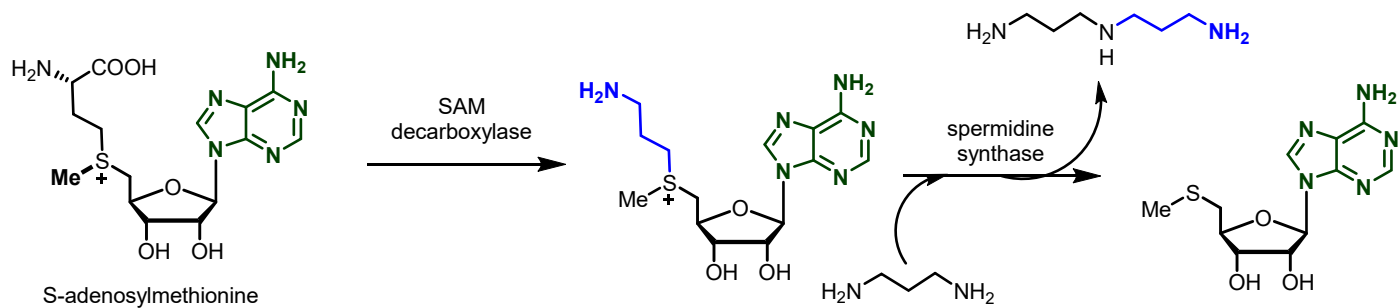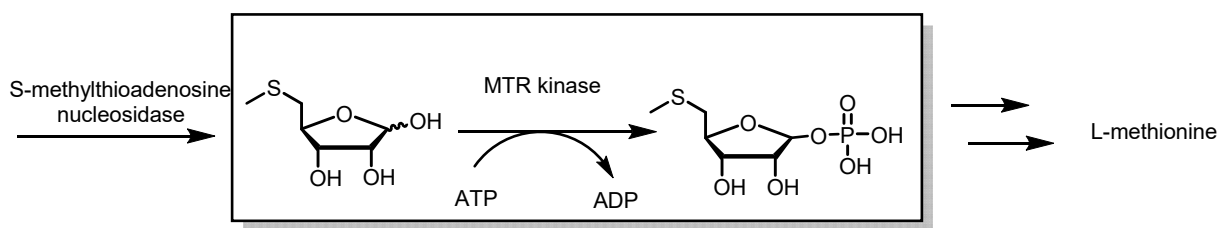

**Desired reaction:**

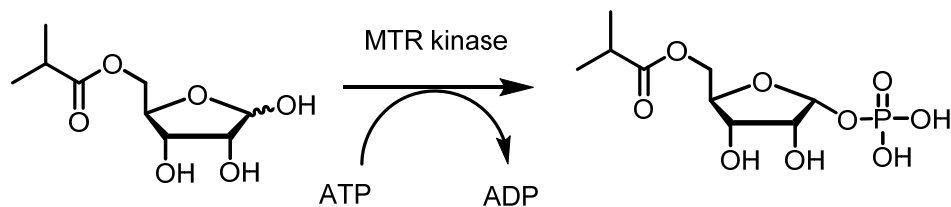

**Table S1. Evolution summary of MTR kinase**

| Round | Backbone mutations (rel. to prev. round) | Assay conditions | Fold improvement in high-throughput assay (rel. to prev. round) | d.r. ( $\alpha:\beta$ ) |
|-------|------------------------------------------|------------------|-----------------------------------------------------------------|-------------------------|
|       |                                          |                  |                                                                 |                         |

|                                       |                                       |                                                                                                                                                                                                                                                                                        |     |       |
|---------------------------------------|---------------------------------------|----------------------------------------------------------------------------------------------------------------------------------------------------------------------------------------------------------------------------------------------------------------------------------------|-----|-------|
| 1.1 (natural diversity combinatorial) | none (WT)                             | 100mM TEoA pH 7.5, 1 mM ATP, 10 mM MgCl <sub>2</sub> , 43 mM proprionyl phosphate, 18 mM uracil, 36 mM 5'-isobutyryl ribose, 72 mM sucrose, 0.05 g/L ACK-101, 0.25 g/L SUP-101, 0.25 g/L UP, 10 vol% lysate                                                                            | n/a | 7:1   |
| 1.2 (SSM)                             | none (WT)                             | 100 mM TEoA pH 7.5, 1 mM ATP, 10 mM MgCl <sub>2</sub> , 216 mM proprionyl phosphate, 90 mM uracil, 100 mM 5'-isobutyryl ribose, 180 mM sucrose, 2 g/L ACK-101, 2 g/L SUP-101, 2 g/L UP, 5 vol% MTR kinase variant lysate.                                                              | n/a | 7:1   |
| 1.3 (SSM)                             | None (WT)                             | 100 mM TEoA pH 7.5, 2 mM ATP, 20 mM MgCl <sub>2</sub> , 120 mM proprionyl phosphate, 90 mM uracil, 100 mM 5'-isobutyryl ribose, 146 mM sucrose, 2 g/L ACK-101, 2 g/L SUP-101, 2 g/L UP, 5 vol% MTR kinase variant lysate.                                                              | n/a | 7:1   |
| 1.4 (SSM)                             | None (WT)                             | 100 mM TEoA pH 7.5, 2 mM ATP, 20 mM MgCl <sub>2</sub> , 120 mM proprionyl phosphate, 90 mM uracil, 100 mM 5'-isobutyryl ribose, 146 mM sucrose, 2 g/L ACK-101, 2 g/L SUP-101, 2 g/L UP, 5 vol% MTR kinase variant lysate.                                                              | n/a | 7:1   |
| 2                                     | L79H                                  | 100 mM TEoA pH 7.5, 2 mM ATP, 20 mM MgCl <sub>2</sub> , 120 mM proprionyl phosphate, 90 mM uracil, 100 mM 5'-isobutyryl ribose, 146 mM sucrose, 2 g/L ACK-101, 2 g/L SUP-101, 2 g/L UP, 5 vol% MTR kinase variant lysate.                                                              | 1.6 | >99:1 |
| 3                                     | V63P, T173S, F177I, I230L             | 0.9 mM ATP, 10 mM MgCl <sub>2</sub> , 0.9 mM TPP, 0.09 mM FAD, 90 mM uracil, 223 mM pyruvic acid, 35 mM K <sub>2</sub> HPO <sub>4</sub> , 180 mM 5'-isobutyryl ribose, 1 g/L ACK-101, 1 g/L PO6, 1 g/L catalase (Roche), 2 g/L UP, adjust pH to 7.0, 1 vol% MTR kinase variant lysate. | 1.5 | >99:1 |
| Final variant                         | H10D, C65A, E68P, A168G, A244V, R384T | -                                                                                                                                                                                                                                                                                      | 3.0 | >99:1 |

**Table S2. Sites targeted for mutagenesis over the course of MTR kinase evolution**

| <b>Round #</b> | <b>Screening Goal</b>                                                     | <b>Library</b>                | <b>Positions</b>                                                                                                                                                                                                                                                                                                                                                                                                                                                 |
|----------------|---------------------------------------------------------------------------|-------------------------------|------------------------------------------------------------------------------------------------------------------------------------------------------------------------------------------------------------------------------------------------------------------------------------------------------------------------------------------------------------------------------------------------------------------------------------------------------------------|
| 1              | Improve activity on 5-isobutyrylribose and selectivity for desired anomer | Combinatorial (1.1)           | 37, 38, 39, 70, 172, 173, 176, 177, 187, 231, 234, 248, 249, 341, 349, 350                                                                                                                                                                                                                                                                                                                                                                                       |
| 1              | Improve activity on 5-isobutyrylribose and selectivity for desired anomer | Single-site mutagenesis (1.2) | 35, 36, 37, 38, 39, 40, 41, 42, 57, 58, 59, 60, 61, 62, 63, 64, 65, 66, 67, 68, 69, 70, 71, 72, 73, 74, 76, 77, 79, 80, 118, 120, 167, 168, 169, 170, 171, 172, 173, 174, 175, 176, 177, 178, 179, 180, 181, 185, 186, 187, 188, 189, 215, 218, 226, 227, 228, 229, 230, 231, 232, 233, 234, 235, 244, 245, 246, 247, 248, 249, 250, 251, 257, 258, 259, 260, 261, 262, 264, 265, 337, 338, 340, 341, 342, 343, 344, 345, 346, 347, 348, 349, 350, 351, 352, 353 |
| 1              | Improve activity on 5-isobutyrylribose and selectivity for desired anomer | Single-site mutagenesis (1.3) | 2, 3, 5, 8, 10, 14, 17, 18, 19, 23, 24, 26, 27, 28, 32, 33, 34, 46, 48, 49, 78, 85, 88, 89, 92, 93, 97, 100, 103, 104, 114, 115, 117, 128, 130, 134, 151, 153, 155, 156, 163, 165, 183, 184, 192, 193, 195, 196, 202, 203, 205, 206, 208, 239, 240, 277, 279, 280, 281, 284, 288, 291, 295, 298, 302, 303, 305, 309, 310, 311, 313, 314, 317, 320, 324, 328, 329, 356, 359, 360, 361, 362, 366, 369, 370, 381, 383, 384, 386, 389, 390, 396, 397, 398, 399, 400  |

|   |                                                                           |                               |                                                                                                                                                                                                                                                                                                                                                                                                                                                                     |
|---|---------------------------------------------------------------------------|-------------------------------|---------------------------------------------------------------------------------------------------------------------------------------------------------------------------------------------------------------------------------------------------------------------------------------------------------------------------------------------------------------------------------------------------------------------------------------------------------------------|
| 1 | Improve activity on 5-isobutyrylribose and selectivity for desired anomer | Single-site mutagenesis (1.3) | 4, 6, 7, 9, 11, 13, 15, 21, 25, 30, 31, 43, 44, 47, 50, 51, 52, 75, 82, 86, 90, 98, 99, 101, 102, 111, 112, 113, 116, 121, 124, 125, 126, 127, 131, 135, 138, 142, 146, 152, 158, 159, 160, 161, 162, 166, 190, 191, 197, 199, 200, 204, 209, 210, 213, 214, 217, 219, 221, 222, 238, 241, 243, 274, 276, 278, 283, 286, 287, 294, 297, 299, 301, 306, 307, 312, 315, 321, 322, 323, 325, 326, 327, 332, 333, 357, 363, 364, 365, 373, 376, 377, 380, 387, 393, 394 |
| 2 | Improve activity on 5-isobutyrylribose                                    | Combinatorial                 | 63, 68, 77, 79, 173, 177, 230, 232, 234, 350                                                                                                                                                                                                                                                                                                                                                                                                                        |
| 3 | Improve activity on 5-isobutyrylribose                                    | Combinatorial                 | 10, 65, 68, 77, 85, 168, 171, 177, 232, 244, 349, 350, 370, 384                                                                                                                                                                                                                                                                                                                                                                                                     |

**Fig. S5. Structural model of mutations present in evolved MTR kinase**

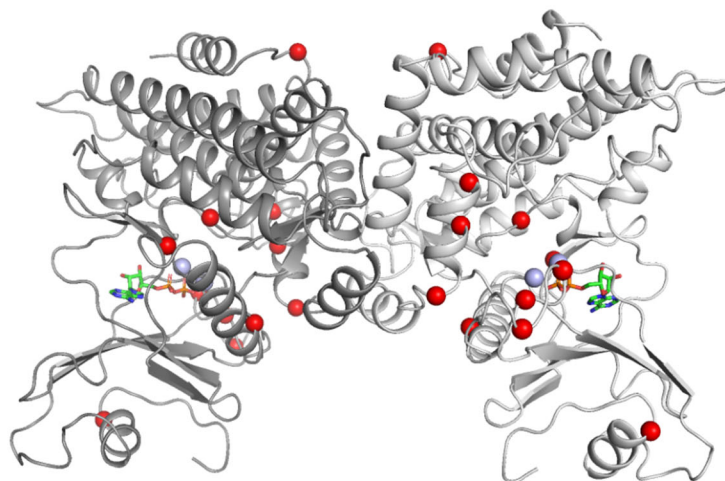

Locations of mutations in the final evolved variant are shown by red spheres. The MTR kinase dimer homology model was prepared using PDB ID 2PYW<sup>6</sup> as the template. The two chains are shown by different shades of gray. The ADP molecule is illustrated by sticks and the two Mg atoms are shown by light blue spheres in each chain.

#### **MTR kinase evolution round 1.1**

MTR kinase evolution screened for improved synthesis of **3** in a cascade reaction from **1**. Reactions were performed in a 96-well format in 2 mL deep-well plates, with 300  $\mu$ L total volume. Reactions included the components listed in table S1 above. The reactions were set up as follows: (i) reaction components excepting uracil and MTR kinase

lysate were mixed and dispensed as a single solution (240  $\mu$ L) (ii) 30  $\mu$ L of a slurry of uracil was dispensed to each well (iii) 30  $\mu$ L of 2x diluted MTR kinase lysate was then added into the wells to initiate the reaction. The reaction plate was heat-sealed with a foil seal, incubated at 30  $^{\circ}$ C with 1000 rpm shaking for 18-20 h. Reaction aliquots (10  $\mu$ L per well) were diluted into 190  $\mu$ L of a 1:1 mixture of acetonitrile/water and then filtered through a 0.2 micron centrifuge filter. The samples were analyzed according to the MTR kinase high-throughput analytical method summarized below.

| <b>MTR kinase high throughput analytical Method</b> |                                                                        |
|-----------------------------------------------------|------------------------------------------------------------------------|
| Instrument                                          | Agilent 1290 UPLC                                                      |
| Column                                              | Acquity BEH Amide 2.1 x 50 mm                                          |
| Mobile Phase                                        | Isocratic 10:90 water : acetonitrile with 2 mM ammonium formate pH 6.5 |
| Flow Rate                                           | 0.6 mL/min                                                             |
| Run Time                                            | 1 min                                                                  |
| Substrate and Product                               | 5'-isobutyryl uridine: 0.28 min                                        |
| Elution order                                       | Uracil: 0.37 min                                                       |
| Column Temperature                                  | 45 $^{\circ}$ C                                                        |
| Injection Volume                                    | 1 $\mu$ L                                                              |
| Detection                                           | UV 254 nm, 360 nm reference, 100 nm reference bandwidth                |

### **MTR kinase evolution rounds 1.2, 1.3, 1.4, and 2**

Reactions were conducted as described above with the following changes: (i) reaction components excepting uracil and MTR kinase were mixed and dispensed as a single solution (255  $\mu$ L); (ii) A slurry of uracil was dispensed to each well (30  $\mu$ L), (iii) MTR kinase lysate was then added to initiate the reaction (15  $\mu$ L).

### **MTR kinase evolution round 3**

MTR kinase evolution screened for improved synthesis of **3** in a cascade reaction from **1**. Reactions were performed in a 96-well format in 2 mL deep-well plates, with 200  $\mu$ L total volume. Reactions included the components listed in table S1 above. The reactions were set up as follows: (i) reaction components excepting uracil and MTR kinase lysate were mixed and dispensed as a single solution to each well (160  $\mu$ L) (ii) 20  $\mu$ L of a slurry of uracil (100 g/L) was dispensed to each well (iii) 20  $\mu$ L of 10x diluted MTR kinase lysate was then added into the wells to initiate the reaction. The reaction plate was heat-sealed with a foil seal, incubated at 30  $^{\circ}$ C with 1000 rpm shaking for 18-20 h. Reaction aliquots (10  $\mu$ L per well) were diluted into 190  $\mu$ L of a 1:1 mixture of acetonitrile/water and then filtered through a 0.2 micron centrifuge filter.

**Fig. S6. Comparison of wild-type MTR kinase Rd1BB and final evolved (Rd4BB) enzymes in the full cascade starting with 5-isobutyrylribose**

|                           | Rd1BB | Rd4BB |
|---------------------------|-------|-------|
| product LCAP% at 0.5 wt%  | 0.35  | 78.90 |
| product LCAP% at 1.0 wt%  | 0.55  | 93.62 |
| product LCAP% at 2.0 wt%  | 1.02  | 97.41 |
| product LCAP% at 5.0 wt%  | 2.28  | 97.39 |
| product LCAP% at 10.0 wt% | 4.58  | 96.16 |

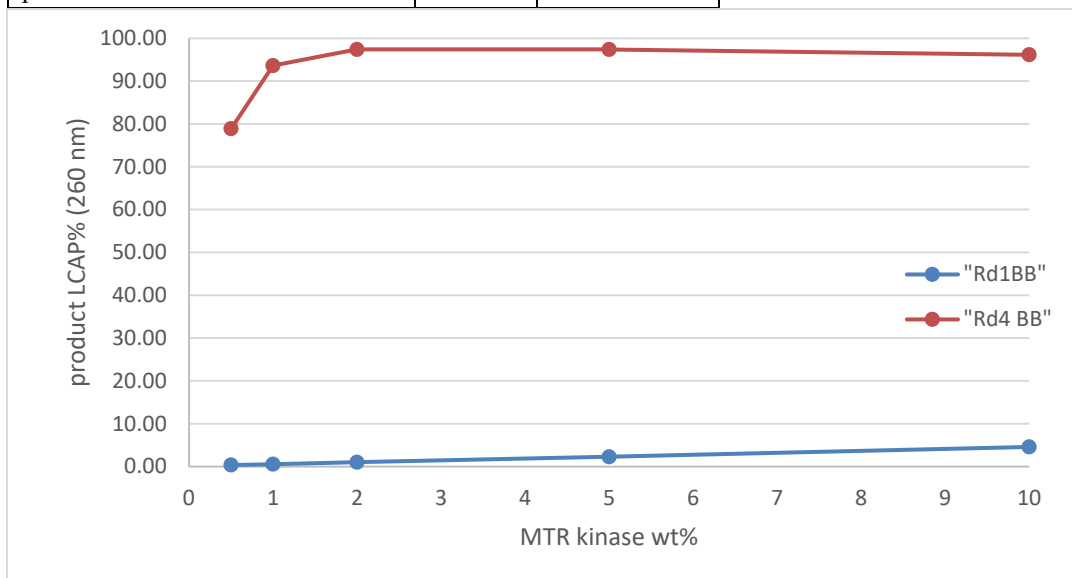

**Procedure:** The activity of MTR kinase enzyme powders at 0.5-10 wt% loading, was evaluated using 0.4 M acyl-ribose concentration (90 g/L), 0.833 eq of uracil (38.2 g/L), 1.25 eq of pyruvic acid (36 g/L),  $\text{KH}_2\text{PO}_4$  (40 mM), 0.0005 eq of FAD, 0.005 eq of ATP, 0.0025 eq of TPP, 0.25 wt% acetate kinase (ACK-101, Codexis), 0.25 wt% catalase (Roche #11650645103), 1.0 wt%  $\text{PO}_3$ , 20 wt% UP Rd2BB (relative to uracil), 25°C, 250 RPM, 85% relative humidity, overnight.

**Table S3. Uridine phosphorylase evolution summary**

| <b>Round</b>  | <b>Backbone mutations (rel. to prev. round)</b>                   | <b>Assay conditions</b>                                                                                                                   | <b>Fold improvement in high-throughput assay (rel. to prev. round)</b> |
|---------------|-------------------------------------------------------------------|-------------------------------------------------------------------------------------------------------------------------------------------|------------------------------------------------------------------------|
| 1             | none (WT)                                                         | 11 mM 5'-isobutyryluridine, 50 mM sodium phosphate pH 7.4, 10 mM KCl, 1 vol% uridine phosphorylase variant lysate, 35 °C, 600 RPM, 16 h   | n/a                                                                    |
| 2             | E91I                                                              | 67 mM 5-isobutyryl-1-phosphate, 67 mM uracil, 50 mM TEoA-HCl pH 7.5, 0.1 vol% uridine phosphorylase variant lysate, 30 °C, 600 RPM, 16 h  | 4.9                                                                    |
| 3             | A252M                                                             | 67 mM 5-isobutyryl-1-phosphate, 67 mM uracil, 50 mM TEoA-HCl pH 7.5, 0.1 vol% uridine phosphorylase variant lysate, 30 °C, 600 RPM, 16 h  | 1.9                                                                    |
| 4             | K14E, V35L, H58W, A200R, I239L, T244S                             | 67 mM 5-isobutyryl-1-phosphate, 67 mM uracil, 50 mM TEoA-HCl pH 7.5, 0.06 vol% uridine phosphorylase variant lysate, 30 °C, 600 RPM, 16 h | 2.1                                                                    |
| 5             | L20M                                                              | 67 mM 5-isobutyryl-1-phosphate, 67 mM uracil, 50 mM TEoA-HCl pH 7.5, 0.04 vol% uridine phosphorylase variant lysate, 30 °C, 600 RPM, 16 h | 1.3                                                                    |
| Final variant | V17S, D40A, K51N, P111G, L132G, L137M, H190R, K192Q, A200E, T248V | -                                                                                                                                         | 2.4                                                                    |

**Table S4. Sites targeted for mutagenesis over the course of uridine phosphorylase evolution**

| Round # | Screening Goal                                           | Library                 | Positions                                                                                                                                                                                                                                                                                                                                                                                                                                                          |
|---------|----------------------------------------------------------|-------------------------|--------------------------------------------------------------------------------------------------------------------------------------------------------------------------------------------------------------------------------------------------------------------------------------------------------------------------------------------------------------------------------------------------------------------------------------------------------------------|
| 1       | Specific activity for phosphorolysis (reverse direction) | Single-site mutagenesis | 17, 18, 20, 34, 35, 36, 38, 39, 40, 42, 44, 45, 58, 60, 61, 75, 76, 77, 78, 80, 82, 83, 84, 85, 86, 87, 88, 91, 101, 103, 105, 106, 107, 108, 109, 110, 113, 114, 115, 116, 117, 119, 121, 124, 127, 128, 133, 167, 168, 169, 170, 171, 172, 173, 174, 175, 176, 177, 178, 179, 195, 204, 205, 206, 207, 210, 211, 212, 213, 225, 226, 227, 228, 229, 230, 231, 232, 233, 234, 235, 236, 237, 238, 239, 240, 241, 242, 244, 245, 246, 248, 249, 250, 252, 253, 256 |



|   |                                                                        |                         |                                                                                                                                                                                                                                                                                                                                                                                                                                                                                                                                                                                                                                                                                                                                                                                                                                                                                                                              |
|---|------------------------------------------------------------------------|-------------------------|------------------------------------------------------------------------------------------------------------------------------------------------------------------------------------------------------------------------------------------------------------------------------------------------------------------------------------------------------------------------------------------------------------------------------------------------------------------------------------------------------------------------------------------------------------------------------------------------------------------------------------------------------------------------------------------------------------------------------------------------------------------------------------------------------------------------------------------------------------------------------------------------------------------------------|
| 2 | Specific activity in forward direction with decreased catalyst loading | Single-site mutagenesis | 13, 14, 15, 16, 17, 18, 19, 20, 21, 22, 23, 24, 25, 26, 27, 33, 34, 35, 36, 37, 38, 39, 40, 41, 42, 43, 44, 45, 46, 47, 48, 49, 50, 55, 56, 57, 58, 59, 60, 61, 62, 63, 64, 74, 75, 76, 77, 78, 79, 80, 81, 82, 83, 84, 85, 86, 87, 88, 89, 90, 92, 93, 94, 95, 96, 99, 100, 101, 102, 103, 104, 105, 106, 107, 108, 109, 110, 111, 112, 113, 114, 115, 116, 117, 118, 119, 120, 121, 122, 123, 124, 125, 126, 127, 128, 129, 130, 131, 132, 133, 134, 139, 141, 142, 143, 147, 148, 151, 162, 163, 164, 165, 166, 167, 168, 169, 170, 171, 172, 173, 174, 175, 176, 177, 178, 179, 180, 181, 182, 183, 184, 188, 191, 194, 195, 196, 197, 198, 199, 200, 202, 203, 204, 205, 206, 207, 208, 209, 210, 211, 212, 213, 214, 215, 216, 217, 224, 225, 226, 227, 228, 229, 230, 231, 232, 233, 234, 235, 236, 237, 238, 239, 240, 241, 242, 243, 244, 245, 246, 247, 248, 249, 250, 251, 252, 253, 254, 255, 256, 257, 259, 260 |
|   |                                                                        | Combinatorial           | 14, 17, 18, 20, 42, 58, 84, 103, 108, 158, 190, 192, 227, 239, 242, 246, 247, 248, 251                                                                                                                                                                                                                                                                                                                                                                                                                                                                                                                                                                                                                                                                                                                                                                                                                                       |
| 3 | Specific activity in forward direction with decreased catalyst loading | Combinatorial           | 14, 35, 44, 58, 58, 106, 111, 119, 122, 171, 194, 196, 200, 227, 229, 239, 244                                                                                                                                                                                                                                                                                                                                                                                                                                                                                                                                                                                                                                                                                                                                                                                                                                               |

|   |                                                                        |                         |                                                                                                                                                                                                                                                                                                                   |
|---|------------------------------------------------------------------------|-------------------------|-------------------------------------------------------------------------------------------------------------------------------------------------------------------------------------------------------------------------------------------------------------------------------------------------------------------|
| 4 | Specific activity in forward direction with decreased catalyst loading | Single-site mutagenesis | 20, 22, 25, 32, 40, 44, 47, 49, 50, 51, 54, 65, 66, 72, 74, 91, 97, 98, 101, 103, 108, 111, 112, 113, 117, 119, 132, 137, 146, 147, 151, 153, 156, 157, 158, 163, 171, 189, 190, 191, 192, 195, 196, 199, 200, 201, 202, 204, 214, 217, 218, 220, 226, 239, 241, 242, 243, 245, 246, 247, 249, 251, 252, 255, 262 |
| 5 | Specific activity in forward direction with decreased catalyst loading | Combinatorial           | 17, 20, 40, 51, 57, 63, 74, 108, 111, 117, 132, 137, 146, 153, 190, 191, 192, 200, 212, 218, 242, 248, 253                                                                                                                                                                                                        |

### Fig. S7. Structural visualizations in UP

Structural visualization of amino-acid differences between the evolved and the wild-type *E. coli* UP based on a reported crystal structure (PDB ID 1K3F)<sup>7</sup>. (a) Hexameric structure of UP (trimer of dimers). (b) Front view of UP monomer; mutated residues are marked as teal spheres. (c) Side view of UP monomer; mutated residues are marked as teal spheres.

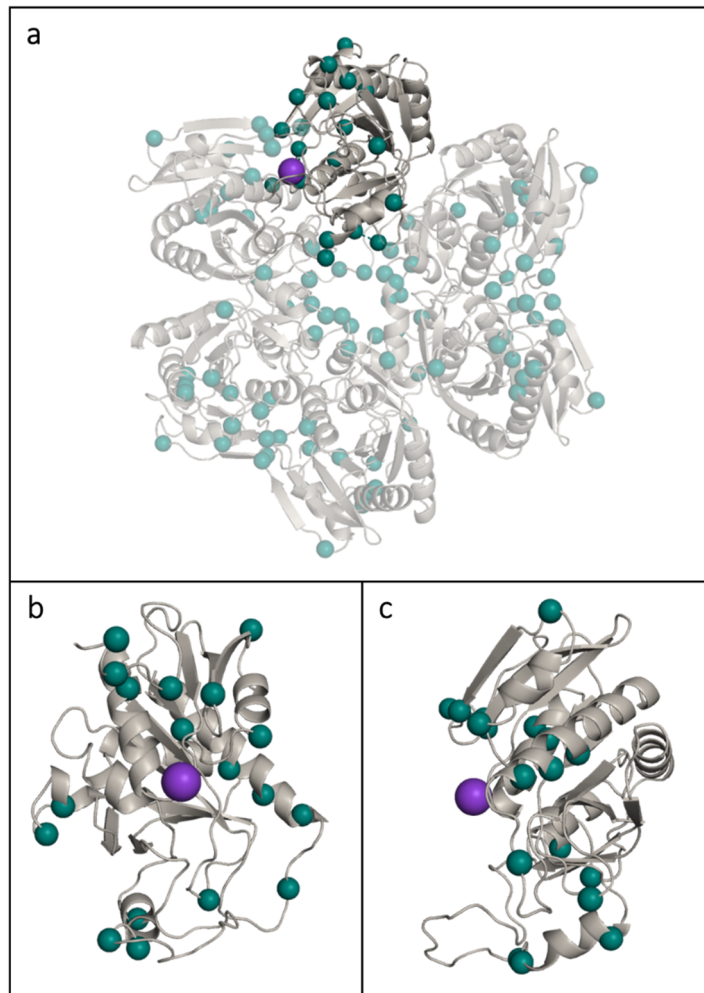

### UP evolution round 1

The initial round of evolution was conducted in the phosphorolytic direction given the limited availability of **2** available at that time, owing to lack of a sufficiently active MTR kinase enzyme. Reactions were performed in a 96-well format in 2 mL deep-well plates, with 100  $\mu$ L total volume. Reactions included 11.1 g/L (3.5 mM) 5'-isobutyryl uridine, 10 mM potassium chloride, 50 mM sodium phosphate, pH 7.4, and 10x diluted UP lysate. The reactions were set up as follows: (i) all the reaction components, except for UP, were pre-mixed in a single solution and 87.5  $\mu$ L of this solution was then aliquoted into each well of the 96-well plates (ii) 12.5  $\mu$ L of 10x diluted UP lysate was then added into the wells to initiate the reaction. The reaction plate was heat-sealed with a foil seal, incubated at 35  $^{\circ}$ C with 600 rpm shaking for 18-20 h. The reactions were quenched with 100  $\mu$ L of a 1:1 mixture of acetonitrile in 20 mM TEOA, pH 7.5 buffer. The quenched reactions were shaken for 3 min on a tabletop shaker followed by centrifugation at 4000 rpm for 10 mins at 4 $^{\circ}$ C to pellet any precipitate. Supernate (50  $\mu$ L) was then transferred into a 96-well round bottom plate prefilled with 100  $\mu$ L of 1:1 mixture of acetonitrile in 20 mM TEOA, pH 7.5 buffer. The samples were analyzed according to the HILIC analytical method summarized below.

| HILIC Analytical Method |                                                     |
|-------------------------|-----------------------------------------------------|
| Instrument              | ThermoScientific U3000 UPLC with UV Detection       |
| Column                  | Xbridge glycan BEH amide, 3.5 $\mu$ m, 4.6 x 100 mm |

|                       |                                                                                                          |
|-----------------------|----------------------------------------------------------------------------------------------------------|
| Mobile Phase          | Isocratic 20:80 water with 0.1% TFA: acetonitrile with 0.1% TFA                                          |
| Flow Rate             | 1.0 mL/min                                                                                               |
| Run Time              | 2.25 min                                                                                                 |
| Substrate and Product | 5'-isobutyryl uridine: 0.93 min                                                                          |
| Elution order         | Uracil: 1.25 min                                                                                         |
| Column Temperature    | 25 °C                                                                                                    |
| Injection Volume      | 2 µL                                                                                                     |
| Detection             | UV 254nm<br>Detector: Thermo VWD-3400; Peak width 0.02min; Collection rate= 200Hz; Time Constant = 0.12s |

### UP evolution round 2

UP-Rd2BB was selected as the parent enzyme based on the results of screening variants toward the synthesis of 5'-isobutyryl uridine from 5'-isobutyryl ribose-1-phosphate and uracil.

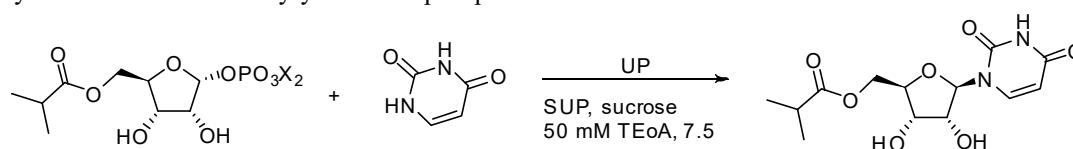

Reactions were performed in a 96-well format in 2 mL deep-well plates, with 100 µL total volume. Reactions included 67 mM 5'-isobutyryl ribose-1-phosphate solution, 7.5 g/L (67 mM) uracil, 91 g/L (267 mM, 4 equiv.) sucrose, 0.019 g/L (0.25 wt% wrt uracil) SUP-101, 50 mM TEOA, pH 7.5, and 100-fold diluted UP lysate. The reactions were set up as follows: (i) all the reaction components, except for UP, were pre-mixed in a single solution and 90 µL of this solution was then aliquoted into each well of the 96-well plates (ii) 10 µL of 100-fold diluted UP lysate was then added into the wells to initiate the reaction. The reaction plate was heat-sealed with a foil seal, incubated at 30 °C with 600 rpm shaking for 18-20 hours. The reactions were quenched with 400 µL of a 1:1 mixture of acetonitrile in 20 mM TEOA, pH 7.5 buffer. The quenched reactions were shaken for 5 min on a tabletop shaker followed by centrifugation at 4000 rpm for 10 mins at 4 °C to pellet any precipitate. Supernate (30 µL) was then transferred into a 96-well round bottom plate pre-filled with 120 µL of 1:9 mixture of acetonitrile in 20 mM TEOA, pH 7.5 buffer. The samples were analyzed according to the reverse-phase analytical method summarized in the table below.

### UP evolution rounds 3-5

Reactions were performed in a 96-well format in 2 mL deep-well plates, with 100 µL total volume. Reactions included 67 mM 5'-isobutyryl ribose-1-phosphate solution, 7.5 g/L (67 mM) uracil, 91 g/L (267 mM, 4 equiv.) sucrose, 0.019 g/L (0.25 wt% wrt uracil) SUP-101, 50 mM TEOA, pH 7.5, and 100-fold diluted UP lysate. The reactions were set up as follows: (i) all the reaction components, except for UP, were pre-mixed in a single solution and 90 µL of this solution was then aliquoted into each well of the 96-well plates (ii) 10 µL of 100x diluted UP lysate was then added into the wells to initiate the reaction. The reaction plate was heat-sealed with a foil seal, incubated at 30 °C with 600 rpm shaking for 18-20 h. The reactions were quenched with 400 µL of a 1:1 mixture of acetonitrile in 20 mM TEOA, pH 7.5 buffer. The quenched reactions were shaken for 5 min on a tabletop shaker followed by centrifugation at 4000 rpm for 10 mins at 4 °C to pellet any precipitate. Supernate (30 µL) was then transferred into a 96-well round bottom plate pre-filled with 120 µL of 1:9 mixture of acetonitrile in 20 mM TEOA, pH 7.5 buffer. The samples were analyzed according to the reverse-phase analytical method summarized in the table below.

| Reverse-Phase Analytical Method |                                              |
|---------------------------------|----------------------------------------------|
| Instrument                      | ThermoFisher Vanquish UPLC with UV Detection |

| <b>Reverse-Phase Analytical Method</b> |                                                                                                                     |
|----------------------------------------|---------------------------------------------------------------------------------------------------------------------|
| Column                                 | Atlantis HSS T3, 1.8 $\mu$ m, 2.1 x 100mm                                                                           |
| Mobile Phase                           | Mobile Phase A: water with 0.1% TFA<br>Mobile Phase B: acetonitrile with 0.1% TFA                                   |
| Gradient                               | 0-1.0 min 5%B, 1.0 – 1.1 min 50% B, 1.1 – 2.7 50% B, 2.7 – 2.8 min 5% B, 2.8 – 3.25 min 5% B                        |
| Flow Rate                              | 0.3 mL/min                                                                                                          |
| Run Time                               | 3.25 min                                                                                                            |
| Substrate and Product<br>Elution order | Uracil : 1.00 min<br>5'-isobutyryl uridine : 2.52 min                                                               |
| Column Temperature                     | 40 °C                                                                                                               |
| Injection Volume                       | 10 $\mu$ L                                                                                                          |
| Detection                              | UV 254nm<br>Detector: Vanquish Diode Array Detector HL; Peak width 0.2min; Collection rate= 2Hz; Time Constant = 2s |

**Fig. S8. Improvement of UP activity over evolution when run as the forward assay (as described in UP Evolution Rounds 3-5).**

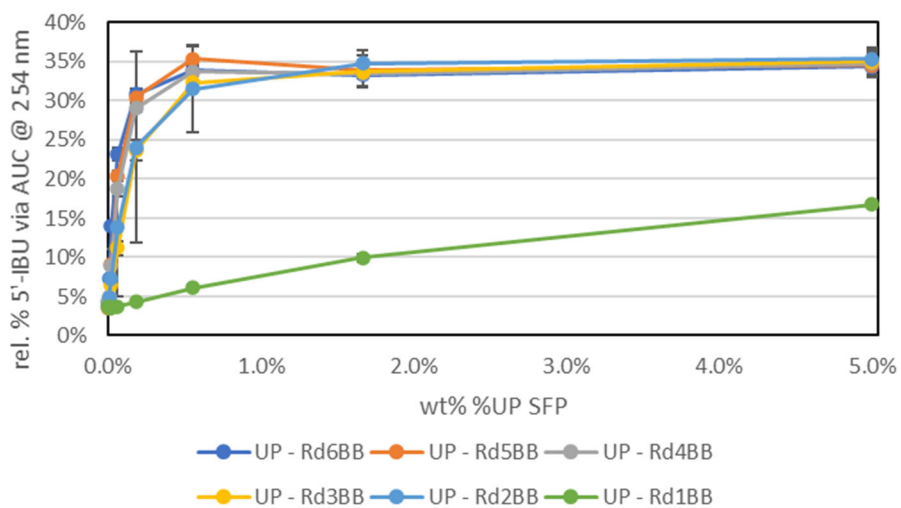

**Fig. S9. Improvement of UP activity over evolution in the context of the cascade, varying SFP concentration for each UP variant from 0 – 5 wt%.**

Reaction conditions: 37 g/L uracil, 1 equiv. 5'-isobutyryl ribose-1-phosphate, 0.5 mol% TPP, 0.5 mol% ATP, 0.05 mol% FAD, 1.25 equiv. pyruvic acid, 0.1 equiv  $K_2HPO_4$ , 0.5 wt% acetate kinase (ACK-101, Codexis) 1.9 wt% evolved MTR-kinase (Rd4), 0.5 wt% catalase (Roche #11650645103), 0.8 wt% pyruvate oxidase 5 (PO5), 10 mM  $MgCl_2$ . Reactions were run at 25 °C, 250 rpm, 85% humidity for 18 h, followed by quench and analysis (as described in UP Evolution Rounds 3-5).

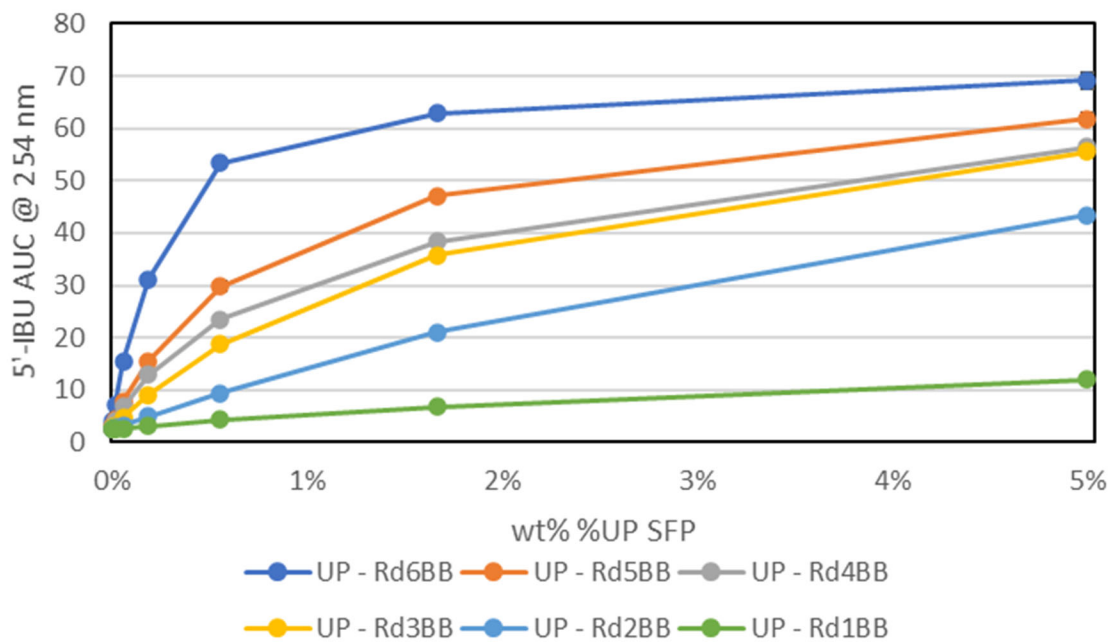

**Fig. S10. Testing of selected uridine phosphorylase variants**

| Enzyme tested | Enzyme loading |             |
|---------------|----------------|-------------|
|               | 1.1 wt% UP     | 0.42 wt% UP |
| Rd4BB         | 69.3           | 36.9        |
| Rd5BB         | 89.9           | 48          |
| Rd6BB         | 100            | 97.3        |

**Procedure:** In a 24 well plate, uracil (83 mg, 0.74 mmol) was added to each of 6 wells. In a 50 mL flask, 19.2 g of 20.6 wt% solution containing 5-isobutyrylribose (3.93 g, 17.9 mmol) was combined with potassium phosphate tribasic (341 mg, 1.61 mmol), pyruvic acid (1.96 g, 22.3 mmol), magnesium chloride hexahydrate (91 mg, 0.45 mmol) and water (8 mL). The pH was adjusted to 7.0 with 8 N KOH. To the solution was added thiamine pyrophosphate disodium salt trihydrate (41.1 mg, 0.089 mmol), adenosine 5'-triphosphate disodium salt trihydrate (54.0 mg, 0.089 mmol), and flavin adenine dinucleotide disodium salt (7.4 mg, 8.9  $\mu$ mol). The pH was adjusted to 7.0. The volume was 31.4 mL, and 8.9 mL water was added to 40.3 mL total.

To the solution were added the enzyme powders sequentially:

Catalase (Roche #11650645103, 9.9 mg, 0.25 wt%)

Pyruvate oxidase PO3 (39.3 mg, 1.0 wt%)

Acetate kinase (Codexis, ACK-101, 9.9 mg, 0.25 wt%)

Methylthioribose kinase MTRK rd 4 BB (118 mg, 3.0 wt%)

2.02 mL of the solution was added to each of the 16 uracil-containing wells in the 24-well plate (for 196 mg isobutyryl ribose each).

Each well was charged with a uridine phosphorylase solution (11 mg/mL uridine phosphorylase in pH 7.0 25 mM phosphate buffer), either 75  $\mu$ L for 0.42 wt% (1.0 wt% vs. uracil), or 189  $\mu$ L for 1.1 wt% (2.5 wt% vs. uracil). The plate sealed with an air-permeable film and was shaken at 250 rpm, 25  $^{\circ}$ C, 85% humidity.

After 20.5 h, mixtures were allowed to settle, and supernatants sampled for HPLC analysis.

**Table S5. Screening for Step 3 Conditions**

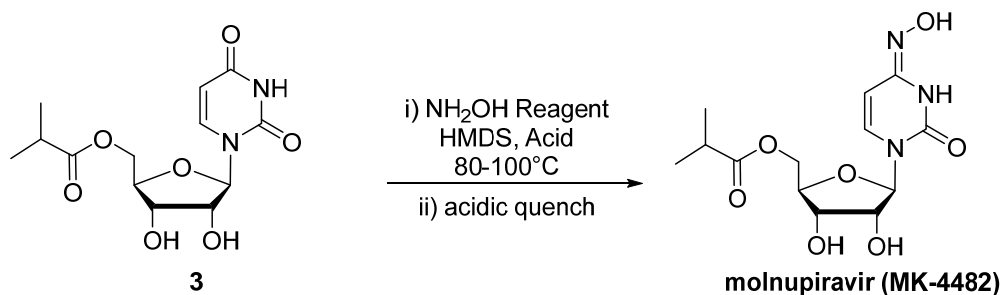

| Entry | NH <sub>2</sub> OH Reagent                                        | Solvent   | Acid                                                     | Conversion |
|-------|-------------------------------------------------------------------|-----------|----------------------------------------------------------|------------|
| 1     | NH <sub>2</sub> OH•HCl                                            | Sulfolane | none                                                     | 0          |
| 2     | NH <sub>2</sub> OH•HCl                                            | Sulfolane | TfOH                                                     | 27         |
| 3     | NH <sub>2</sub> OH•HCl                                            | Sulfolane | H <sub>2</sub> SO <sub>4</sub>                           | 85         |
| 4     | (NH <sub>2</sub> OH) <sub>2</sub> •H <sub>2</sub> SO <sub>4</sub> | Sulfolane | H <sub>2</sub> SO <sub>4</sub>                           | 89         |
| 5     | (NH <sub>2</sub> OH) <sub>2</sub> •H <sub>2</sub> SO <sub>4</sub> | 2-MeTHF   | H <sub>2</sub> SO <sub>4</sub>                           | 79         |
| 6     | (NH <sub>2</sub> OH) <sub>2</sub> •H <sub>2</sub> SO <sub>4</sub> | DME       | H <sub>2</sub> SO <sub>4</sub>                           | 89         |
| 7     | (NH <sub>2</sub> OH) <sub>2</sub> •H <sub>2</sub> SO <sub>4</sub> | none      | H <sub>2</sub> SO <sub>4</sub>                           | 89         |
| 8     | (NH <sub>2</sub> OH) <sub>2</sub> •H <sub>2</sub> SO <sub>4</sub> | none      | (NH <sub>4</sub> )HSO <sub>4</sub>                       | 69         |
| 9     | (NH <sub>2</sub> OH) <sub>2</sub> •H <sub>2</sub> SO <sub>4</sub> | none      | (NH <sub>4</sub> )HSO <sub>4</sub> + 0.5 equiv imidazole | 99         |

In a vial was added **2**, hydroxylamine reagent, solvent, HMDS, then acid. The resulting mixture was aged at 80-100 $^{\circ}$ C for 24 h, and the conversion was determined with a calibrated UPLC instrument. The assay yield was measured after dissolving the reaction mixture in aqueous acetonitrile and measuring the product absorbance value on a calibrated UPLC instrument.



**Fig. S11. Conditions for multigram scale reactions**

**Step 1**

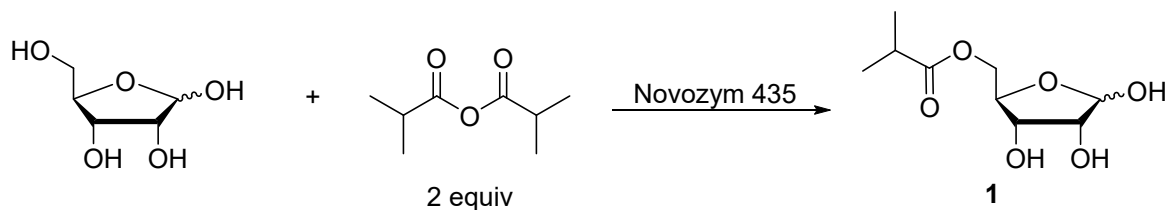

To a 2 L vessel is charged ribose (50 g), Novozym435 (5 g, commercially available from Novozymes (catalog # 3925009-810)), acetone (1 L), and isobutyric anhydride (2.0 equiv). The contents were heated and aged at 50°C for 12 h. The mixture was cooled, filtered, and the solid rinsed with acetone. The filtrate was concentrated under vacuum to approximately 150 mL total volume. MTBE (200 mL) was added, and the organic solution was extracted four times each with 100 mL of water. The aqueous mixture was partially concentrated under vacuum to a final weight of 332 g. 92% yield as determined with a calibrated UPLC-CAD instrument. The solution was used directly in the following step.

**Step 2**

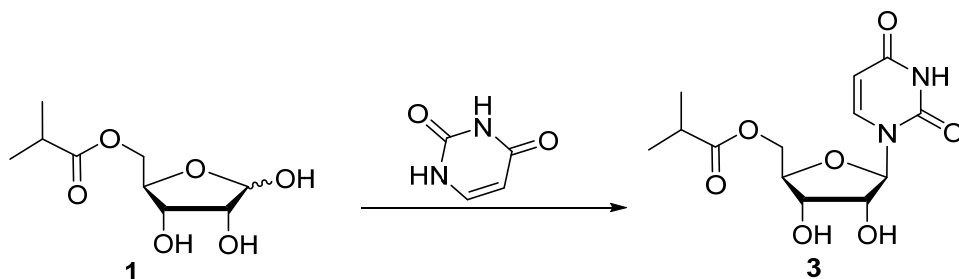

In a 1000 mL flask, charged 5-isobutyryl ribose (72 g, 327 mmol, 349.5 g as 20.6 wt% aqueous solution coming directly from the previous step), followed by pyruvic acid (36.0 g, 409 mmol), potassium phosphate dibasic (5.52 g, 31.7 mmol) and  $\text{MgCl}_2 \cdot 6\text{H}_2\text{O}$  (8 mmol 1.63 g). The pH was adjusted to ~7.1 with approximately 67 mL 8 N KOH, then the volume of the solution was adjusted to approximately 800 mL by adding water. To the solution, thiamine pyrophosphate (0.753 g, 1.635 mmol), adenosine triphosphate disodium salt hydrate (0.989 g, 1.635 mmol), and flavin adenine dinucleotide disodium salt (0.136 g, 0.163 mmol), and performed a final pH adjustment to 7.0 with 8 N KOH. In parallel, uracil (30.5 g, 272 mmol), 180 mg acetate kinase (ACK-101, Codexis), 720 mg pyruvate oxidase, 180 mg catalase (Roche #11650645103), 3.6 g of evolved MTR-kinase (Rd4) and 6.1 g of evolved UP varian (Rd2) t was added to a clean and dry Optimax vessel, followed by the 5' isobutyryl ribose solution and Antifoam 204 (500  $\mu\text{L}$ , commercially available form Sigma-Aldrich). Using the overhead stirring available with the OptiMax reactor, the mixture was agitated at 25°C at 1000 rpm while air was sparged through a tubing to supply oxygen at 0.5 slpm in the solution for 16 h. The solution was checked by HPLC to show the formation of 5'-isobutyryl uridine.

The mixture was transferred to a round bottom flask with Celite diatomaceous earth (86 g), MeTHF (850 mL), and ammonium sulfate (258 g), and heated at 75 °C for 30 min. The mixture was cooled to ambient

temperature, filtered, and the aqueous phase was discarded. The organic phase was washed twice with water (86 mL, then 43 mL). The solvent was exchanged to EtOAc and heptane was added to crystallize the product, then aged at 0-5 °C. The crystalline product was collected and washed with a 1:1.5 mixture of EtOAc:heptane to afford ((2R,3S,4R,5R)-5-(2,4-dioxo-3,4-dihydropyrimidin-1(2H)-yl)-3,4-dihydroxytetrahydrofuran-2-yl)methyl isobutyrate in 87% isolated yield (>99.5 wt% as determined by QNMR and a calibrated UPLC instrument).

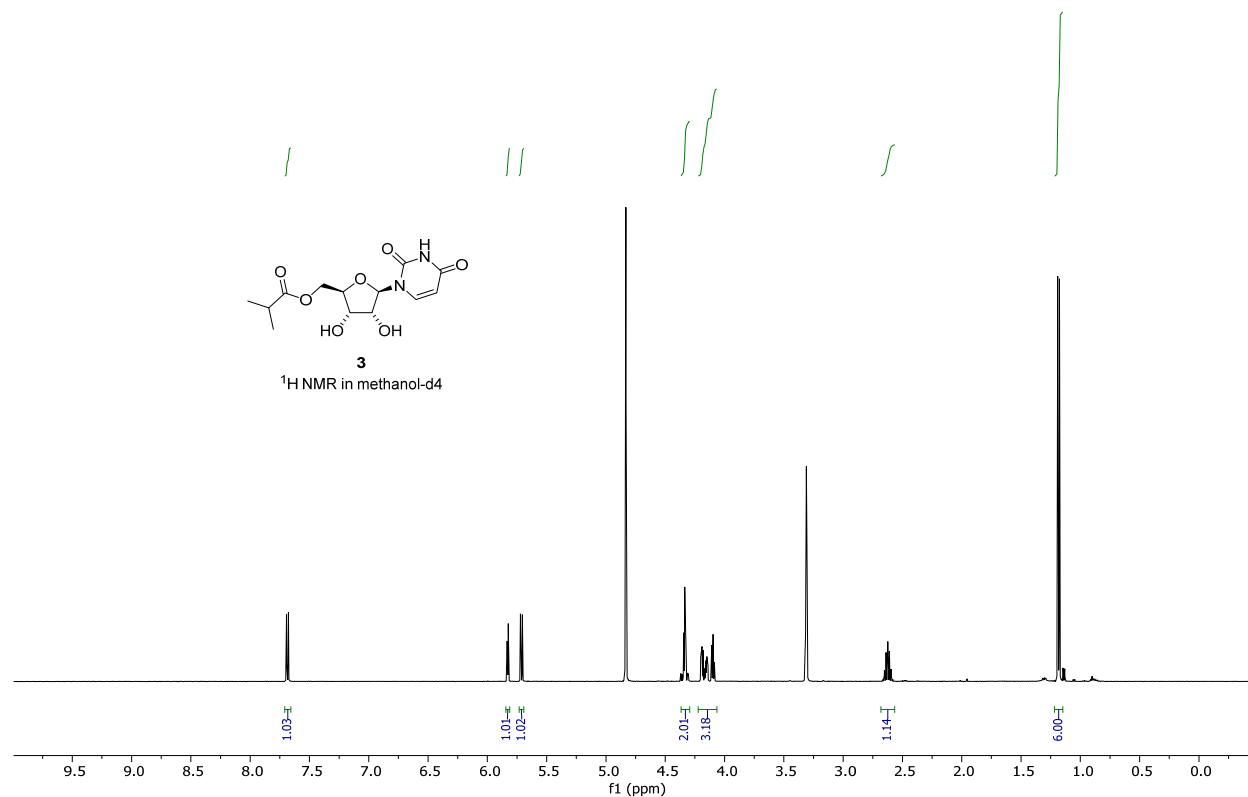

### Step 3

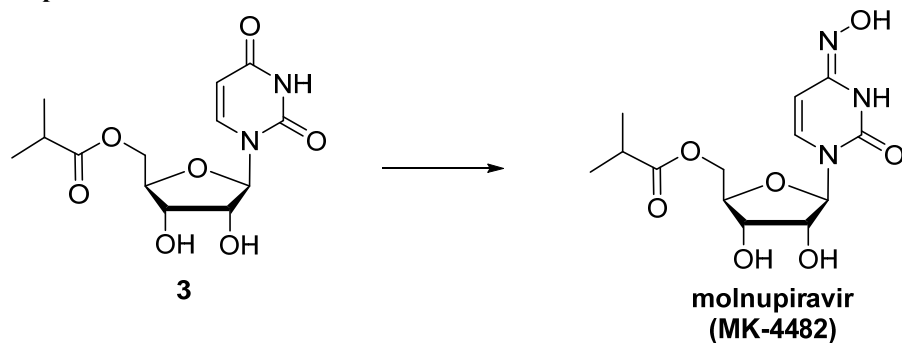

A 100 mL vessel with overhead stirrer was set up under nitrogen. The vessel was charged with HMDS (68.0 ml, 320 mmol), and the reaction temperature was raised to 76°C. Imidazole (1.362 g, 20.00 mmol) was added, and the mixture was stirred at 78°C for 30min during which time all the imidazole had dissolved. Ammonium

hydrogen sulfate (11.51 g, 100 mmol) was added, the temperature was adjusted to an external temperature of 75°C, and the mixture was stirred for 30min. Hydroxylamine sulfate (8.21 g, 50.0 mmol) was added. ((2R,3S,4R,5R)-5-(2,4-dioxo-3,4-dihydropyrimidin-1(2H)-yl)-3,4-dihydroxytetrahydrofuran-2-yl)methyl isobutyrate (12.57 g, 40 mmol) was added, and the reaction mixture was aged with stirring at 75-85°C for 6h, then cooled to ambient temperature.

Water (30.00 ml) was added, and the mixture was transferred to a separatory funnel using 3 mL of water and 2 portions of heptane (5.00 ml) to complete the transfer. The aqueous phase was discarded. The organic phase was washed twice with water (10.00 ml), and the aqueous phases were discarded. Formic acid (6.00 ml, 156 mmol) was added in a single portion, and the mixture was stirred at 50°C for 1h. Water (25.00 ml) was added with stirring, and the mixture was transferred to a separatory funnel using water (10.00 ml) and heptane (5.00 ml). The aqueous phase was separated, and the organic phase was extracted with water (10.00 ml). The organic phase was discarded. The combined aqueous extracts were basified with ammonium hydroxide (1.01 mL, 72.0 mmol). EtOAc (50.0 ml) and ammonium sulfate (40.0 g, 302 mmol) were added, and the mixture was heated to 50°C to give two homogeneous phases. The phases were separated at 50°C, and the aqueous phase was extracted with EtOAc (50.0 ml). The EtOAc extracts were combined and concentrated to approximately 40 mL volume. EtOAc (50.0 ml) was added, and the mixture was concentrated to approximately 40 mL volume. Again EtOAc (50.0 ml) was added, and the mixture was concentrated to approximately 40 mL volume. The resulting slurry was maintained at reflux (75-80°C) for 15min and gradually cooled to 60°C over 30min. MTBE (40.0 ml) was added, then the mixture was cooled to 0°C over 2h. The slurry was filtered, and the filter cake was washed with MTBE (40.0 ml) and dried under nitrogen stream to provide ((2R,3S,4R,5R)-3,4-dihydroxy-5-((Z)-4-(hydroxyimino)-2-oxo-3,4-dihydropyrimidin-1(2H)-yl)tetrahydrofuran-2-yl)methyl isobutyrate in 86% isolated yield (>99.5 wt% purity as determined by a calibrated UPLC instrument).

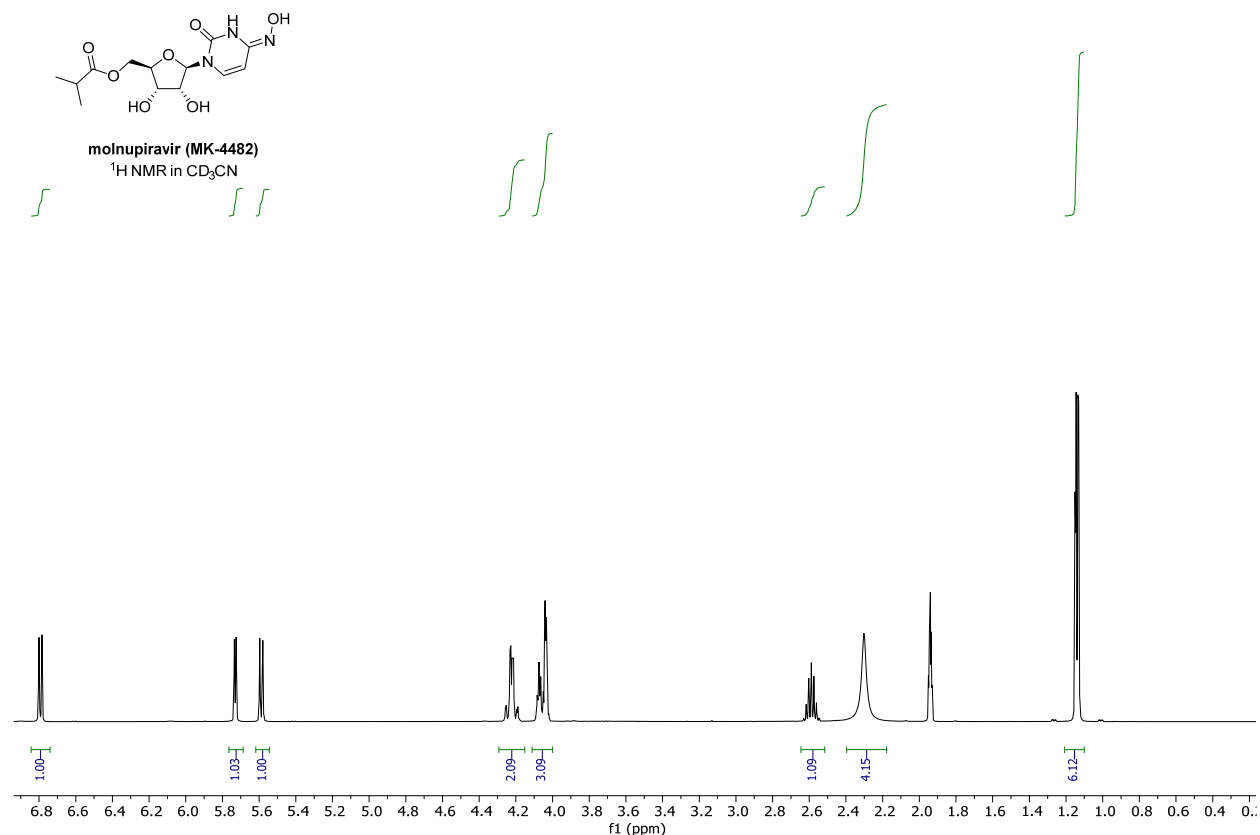

## Sequences

>Rd1\_WT\_MTR\_kinase\_klebsiella spp.

ATGAGCCAGTATCATACCTTCACCGCGCATGATGCGGTGGCGTATGCGCAGCAATTT  
GCGGGCATTGATAACCCGAGCGAGCTGGTTAGCGCGCAAGAAGTTGGTGACGGCAA  
CCTGAACCTGGTGTTC AAGGTTTTT GATCGTCAGGGTGTGAGCCGTGCGATCGTTAA  
ACAAGCGCTGCCGTACGTGCGTTGCGTTGGTGAAAGCTGGCCGCTGACCCTGGACC  
GTGCGCGTCTGGAAGCGCAGACCCTGGTGGCGCACTATCAGCACAGCCCGCAACAC  
ACCGTTAAGATCCACCACTTCGATCCGGAGCTGGCGGTGATGGTTATGGAAGACCTG  
AGCGATCACCGTATTTGGCGTGGT GAGCTGATCGCGAACGTGTACTATCCGCAGGCG  
GCGCGTCAACTGGGTGACTACCTGGCGCAGGTTCTGTTCCACACCAGCGATTTTTTAT  
CTGCACCCGCACGAGAAGAAAGCGCAGGTGGCGCAATTCATTAACCCGGCGATGTG  
CGAGATCACCGAAGACCTGTTCTTTAACGATCCGTACCAGATTCACGAACGTAACAA  
CTATCCGGCGGAGCTGGAAGCGGATGTGGCGGGCGCTGCGTGATGATGCGCAACTGA  
AGCTGGCGGTTGCGGCGCTGAAACACCGTTTCTTTGCGCATGCGGAGGCGCTGCTGC  
ATGGTGACATTCACAGCGGCAGCATCTTCGTTGCGGAGGGTAGCCTGAAGGCGATC  
GACGCGGAATTCGGTTACTTTGGCCCGATCGGTTTTGATATTGGTACCGCGATCGGC  
AACCTGCTGCTGAACTATTGCGGTCTGCCGGGTCAACTGGGTATTCGTGATGCGGCG  
GCGGCGCGTGAACAGCGTCTGAACGATATCCACCAACTGTGGACCACCTTCGCGGA  
GCGTTTTCAAGCGCTGGCGGCGGAAAAGACCCGTGACGCGGCGCTGGCGTACCCGG  
GTTATGCGAGCGCGTTCCTGAAGAAAGTGTGGGCGGATGCGGTTGGTTTTTGGCGCA  
GCGAGCTGATTTCGTTCGTAGCGTGGGCCTGAGCCACGTTGCGGACATCGATAACCATTC  
AGGACGATGCGATGCGTCACGAATGCCTGCGTCACGCGATCACCTGGGTCTGTGCG  
CTGATTGTTCTGGCGGAGCGTATCGACAGCGTGGATGAACTGCTGGCGCGTGTTTCGT  
CAATACAGCCTCGAGCACCACCACCACCACCACTGA

> Rd2\_MTR\_kinase

ATGAGCCAGTATCATACCTTCACCGCGCATGATGCGGTGGCGTATGCGCAGCAATTT  
GCGGGCATTGATAACCCGAGCGAGCTGGTTAGCGCGCAAGAAGTTGGTGACGGCAA  
CCTGAACCTGGTGTTC AAGGTTTTT GATCGTCAGGGTGTGAGCCGTGCGATCGTTAA  
ACAAGCGCTGCCGTACGTGCGTTGCGTTGGTGAAAGCTGGCCGCTGACCCTGGACC  
GTGCGCGTCATGAAGCGCAGACCCTGGTGGCGCACTATCAGCACAGCCCGCAACAC  
ACCGTTAAGATCCACCACTTCGATCCGGAGCTGGCGGTGATGGTTATGGAAGACCTG  
AGCGATCACCGTATTTGGCGTGGT GAGCTGATCGCGAACGTGTACTATCCGCAGGCG  
GCGCGTCAACTGGGTGACTACCTGGCGCAGGTTCTGTTCCACACCAGCGATTTTTTAT  
CTGCACCCGCACGAGAAGAAAGCGCAGGTGGCGCAATTCATTAACCCGGCGATGTG  
CGAGATCACCGAAGACCTGTTCTTTAACGATCCGTACCAGATTCACGAACGTAACAA  
CTATCCGGCGGAGCTGGAAGCGGATGTGGCGGGCGCTGCGTGATGATGCGCAACTGA  
AGCTGGCGGTTGCGGCGCTGAAACACCGTTTCTTTGCGCATGCGGAGGCGCTGCTGC  
ATGGTGACATTCACAGCGGCAGCATCTTCGTTGCGGAGGGTAGCCTGAAGGCGATC  
GACGCGGAATTCGGTTACTTTGGCCCGATCGGTTTTGATATTGGTACCGCGATCGGC  
AACCTGCTGCTGAACTATTGCGGTCTGCCGGGTCAACTGGGTATTCGTGATGCGGCG  
GCGGCGCGTGAACAGCGTCTGAACGATATCCACCAACTGTGGACCACCTTCGCGGA  
GCGTTTTCAAGCGCTGGCGGCGGAAAAGACCCGTGACGCGGCGCTGGCGTACCCGG  
GTTATGCGAGCGCGTTCCTGAAGAAAGTGTGGGCGGATGCGGTTGGTTTTTGGCGCA  
GCGAGCTGATTTCGTTCGTAGCGTGGGCCTGAGCCACGTTGCGGACATCGATAACCATTC

AGGACGATGCGATGCGTCACGAATGCCTGCGTCACGCGATCACCCCTGGGTCGTGCG  
CTGATTGTTCTGGCGGAGCGTATCGACAGCGTGGATGAACTGCTGGCGCGTGTTTCGT  
CAATACAGCCTCGAGCACCACCACCACCACCACTGA

> Rd3\_MTR\_kinase

ATGAGCCAGTATCATACCTTCACCGCGCATGATGCGGTGGCGTATGCGCAGCAATTT  
GCGGGCATTGATAACCCGAGCGAGCTGGTTAGCGCGCAAGAAGTTGGTGACGGCAA  
CCTGAACCTGGTGTTC AAGTTTTT GATCGTCAGGGTGTGAGCCGTGCGATCGTTAA  
ACAAGCGCTGCCGTACCCCGTTGCGTTGGTGAAAGCTGGCCGCTGACCCTGGACCG  
TGCGCGTCATGAAGCGCAGACCCTGGTGGCGCACTATCAGCACAGCCCGCAACACA  
CCGTTAAGATCCACCACTTCGATCCGGAGCTGGCGGTGATGGTTATGGAAGACCTGA  
GCGATCACCGTATTTGGCGTGGTGAGCTGATCGCGAACGTGTACTATCCGCAGGCCG  
CGCGTCAACTGGGTGACTACCTGGCGCAGGTTCTGTTCCACACCAGCGATTTTTATC  
TGCACCCGCACGAGAAGAAAGCGCAGGTGGCGCAATTCATTAACCCGGCGATGTGC  
GAGATCAGCGAAGACCTGATTTTTAACGATCCGTACCAGATTCACGAACGTAACAA  
CTATCCGGCGGAGCTGGAAGCGGATGTGGCGGGCGCTGCGTGATGATGCGCAACTGA  
AGCTGGCGGTTGCGGGCGCTGAAACACCGTTTCTTTGCGCATGCGGAGGCCGCTGCTGC  
ATGGTGACCTTCACAGCGGCAGCATCTTCGTTGCGGAGGGTAGCCTGAAGGCCGATC  
GACGCGGAATTCGGTTACTTTGGCCCGATCGGTTTTGATATTGGTACCCGCGATCGGC  
AACCTGCTGCTGAACTATTGCGGTCTGCCGGGTCAACTGGGTATTCGTGATGCGGGCG  
GCGGCGCGTGAACAGCGTCTGAACGATATCCACCAACTGTGGACCACCTTCGCGGA  
GCGTTTTCAAGCGCTGGCGGGCGGAAAAGACCCGTGACGCGGGCGCTGGCGTACCCGG  
GTTATGCGAGCGCGTTCCTGAAGAAAGTGTGGGCGGATGCGGTTGGTTTTTTCGGCA  
GCGAGCTGATTCGTTCGTAGCGTGGGCCTGAGCCACGTTGCGGACATCGATAACATTC  
AGGACGATGCGATGCGTCACGAATGCCTGCGTCACGCGATCACCCCTGGGTCGTGCG  
CTGATTGTTCTGGCGGAGCGTATCGACAGCGTGGATGAACTGCTGGCGCGTGTTTCGT  
CAATACAGCCTCGAGCACCACCACCACCACCACTGA

> Final variant\_MTR\_kinase

ATGAGCCAGTATCATACCTTCACCGCGGATGATGCGGTGGCGTATGCGCAGCAATTT  
GCGGGCATTGATAACCCGAGCGAGCTGGTTAGCGCGCAAGAAGTTGGTGACGGCAA  
CCTGAACCTGGTGTTC AAGTTTTT GATCGTCAGGGTGTGAGCCGTGCGATCGTTAA  
ACAAGCGCTGCCGTACCCCGTTCGCGTTGGTCCGAGCTGGCCGCTGACCCTGGACCG  
TGCGCGTCATGAAGCGCAGACCCTGGTGGCGCACTATCAGCACAGCCCGCAACACA  
CCGTTAAGATCCACCACTTCGATCCGGAGCTGGCGGTGATGGTTATGGAAGACCTGA  
GCGATCACCGTATTTGGCGTGGTGAGCTGATCGCGAACGTGTACTATCCGCAGGCCG  
CGCGTCAACTGGGTGACTACCTGGCGCAGGTTCTGTTCCACACCAGCGATTTTTATC  
TGCACCCGCACGAGAAGAAAGCGCAGGTGGCGCAATTCATTAACCCGGGCATGTGC  
GAAATCAGCGAAGACCTGAGCTTTAACGATCCGTACCAGATTCACGAACGTAACAA  
CTATCCGGCGGAGCTGGAAGCGGATGTGGCGGGCGCTGCGTGATGATGCGCAACTGA  
AGCTGGCGGTTGCGGGCGCTGAAACACCGTTTCTTTGCGCATGCGGAGGCCGCTGCTGC  
ATGGTGACCTTCACAGCGGCAGCATCTTCGTTGCGGAGGGTAGCCTGAAGGTGATCG  
ACGCGGAATTCGGTTACTTTGGCCCGATCGGTTTTGATATTGGTACCCGCGATCGGCA  
ACCTGCTGCTGAACTATTGCGGTCTGCCGGGTCAACTGGGTATTCGTGATGCGGGCG  
CGGCGCGTGAACAGCGTCTGAACGATATCCACCAACTGTGGACCACCTTCGCGGAG  
CGTTTTCAAGCGCTGGCGGGCGGAAAAGACCCGTGACGCGGGCGCTGGCGTACCCGGG

TTATGCGAGCGCGTTCCTGAAGAAAGTGTGGGCGGATGCGGTTGGTTTTTTCGGCAG  
CGAGCTGATTCGTCGTAGCGTGGGCCTGTCGCACGTTGCGGACATCGATAACCATTCA  
GGACGATGCGATGCGTCACGAATGCCTGCGTCACGCGATCACCTGGGTTCGTGCGCT  
GATTGTTCTGGCGGAGACCATCGACAGCGTGGATGAACTGCTGGCGCGTGTTCGTCA  
ATACAGCCTCGAGCACCACCACCACCCTGA

>Rd1BB\_UP

ATGTCCAAGTCTGATGTTTTTCATCTCGGCCTCACTAAAAACGATTTACAAGGGGCTACGCTT  
GCCATCGTCCCTGGCGACCCGGATCGTGTGGAAAAGATCGCCGCGCTGATGGATAAGCCGG  
TTAAGCTGGCATCTCACCGCAATTCACCTACCTGGCGTGCAGAGCTGGATGGTAAACCTGTT  
ATCGTCTGCTCTACCGGTATCGGCGGCCCGTCTACCTCTATTGCTGTTGAAAGAGCTGGCACA  
GCTGGGCATTTCGCACCTTCCTGCGTATCGGTACAACGGGCGCTATTAGCCGCATATTAATG  
TGGGTGATGTCCTGGTTACCACGGCGTCTGTCCGTCTGGATGGCGCGAGCCTGCACTTCGCA  
CCGCTGGAATCCCGGCTGTCGCTGATTCGAATGTACGACTGCGCTGGTTGAAGCTGCGAA  
ATCCATTGGCGCGACAACCTCACGTTGGCGTGACAGCTTCTTCTGATACCTTCTACCCAGGTCA  
GGAACGTTACGATACTTACTCTGGTCGCGTAGTTCGTCACCTTTAAAGGTTCTATGGAAGAGT  
GGCAGGCGATGGGCGTAATGAACTATGAAATGGAATCTGCAACCCTGCTGACCATGTGCGC  
AAGTCAGGGCCTGCGTGCCGGTATGGTAGCGGGTGTATCGTTAACCGCACCCAGCAAGAG  
ATCCCGAATGCTGAGACGATGAAACAAACCGAAAGCCATGCGGTGAAAATCGTGGTGGAAAG  
CGGCGCGTCTGCTG

>Rd2BB\_UP

ATGTCCAAGTCTGATGTTTTTCATCTCGGCCTCACTAAAAACGATTTACAAGGGGCTACGCTT  
GCCATCGTCCCTGGCGACCCGGATCGTGTGGAAAAGATCGCCGCGCTGATGGATAAGCCGG  
TTAAGCTGGCATCTCACCGCAATTCACCTACCTGGCGTGCAGAGCTGGATGGTAAACCTGTT  
ATCGTCTGCTCTACCGGTATCGGCGGCCCGTCTACCTCTATTGCTGTTGAAATTCTGGCACAG  
CTGGGCATTTCGCACCTTCCTGCGTATCGGTACAACGGGCGCTATTAGCCGCATATTAATGT  
GGGTGATGTCCTGGTTACCACGGCGTCTGTCCGTCTGGATGGCGCGAGCCTGCACTTCGCAC  
CGCTGGAATCCCGGCTGTCGCTGATTCGAATGTACGACTGCGCTGGTTGAAGCTGCGAAA  
TCCATTGGCGCGACAACCTCACGTTGGCGTGACAGCTTCTTCTGATACCTTCTACCCAGGTGAG  
GAACGTTACGATACTTACTCTGGTCGCGTAGTTCGTCACCTTTAAAGGTTCTATGGAAGAGTG  
GCAGGCGATGGGCGTAATGAACTATGAAATGGAATCTGCAACCCTGCTGACCATGTGCGCA  
AGTCAGGGCCTGCGTGCCGGTATGGTAGCGGGTGTATCGTTAACCGCACCCAGCAAGAGAT  
CCCGAATGCTGAGACGATGAAACAAACCGAAAGCCATGCGGTGAAAATCGTGGTGGAAAGCG  
GCGCGTCTGCTG

>Rd3BB\_UP

ATGTCCAAGTCTGATGTTTTTCATCTCGGCCTCACTAAAAACGATTTACAAGGGGCTACGCTT  
GCCATCGTCCCTGGCGACCCGGATCGTGTGGAAAAGATCGCCGCGCTGATGGATAAGCCGG  
TTAAGCTGGCATCTCACCGCAATTCACCTACCTGGCGTGCAGAGCTGGATGGTAAACCTGTT  
ATCGTCTGCTCTACCGGTATCGGCGGCCCGTCTACCTCTATTGCTGTTGAAATTCTGGCACAG  
CTGGGCATTTCGCACCTTCCTGCGTATCGGTACAACGGGCGCTATTAGCCGCATATTAATGT  
GGGTGATGTCCTGGTTACCACGGCGTCTGTCCGTCTGGATGGCGCGAGCCTGCACTTCGCAC  
CGCTGGAATCCCGGCTGTCGCTGATTCGAATGTACGACTGCGCTGGTTGAAGCTGCGAAA  
TCCATTGGCGCGACAACCTCACGTTGGCGTGACAGCTTCTTCTGATACCTTCTACCCAGGTGAG  
GAACGTTACGATACTTACTCTGGTCGCGTAGTTCGTCACCTTTAAAGGTTCTATGGAAGAGTG  
GCAGGCGATGGGCGTAATGAACTATGAAATGGAATCTGCAACCCTGCTGACCATGTGCGCA  
AGTCAGGGCCTGCGTGCCGGTATGGTAGCGGGTGTATCGTTAACCGCACCCAGCAAGAGAT

CCCGAATGCTGAGACGATGAAACAAACCGAAAGCCATATGGTGAAAATCGTGGTGGAAGCG  
GCGCGTCGTCTGCTG

>Rd4BB\_UP

ATGTCCGAATCTGATGTTTTTCATCTCGGCCTCACTAAAAACGATTTACAAGGGGCTACGCTT  
GCCATCCTGCCTGGCGACCCGGATCGTGTGGAAAAAATCGCCGCGCTGATGGATAAGCCGG  
TTAAGCTGGCATCTTGGCGCGAATTCACCTACCTGGCGTGCAGAGCTGGATGGTAAACCTGTT  
ATCGTCTGCTCTACCGGTATCGGCGGCCCGTCTACCTCTATTGCTGTTGAAATTCTGGCACAG  
CTGGGCATTTCGCACCTTCCTGCGTATCGGTACAACGGGCGCTATTCAGCCGCATATTAATGT  
GGGTGATGTCCTGGTTACCACGGCGTCTGTCCGTCTGGATGGCGCGAGCCTGCACTTCGCAC  
CGCTGGAATTCCCGGCTGTCGCTGATTTTGAATGTACGACTGCGCTGGTTGAAGCTGCGAAA  
TCCATTGGCGCGACAACCTCACGTTGGCGTGACAGCTTCTTCTGATACCTTCTACCCAGGTCAG  
GAACGTTACGATACTTACTCTGGTCGCGTAGTTCGTCACCTTAAAGGTTCTATGGAAGAGTG  
GCAGCGTATGGGCGTAATGAACTATGAAATGGAATCTGCAACCCTGCTGACCATGTGCGCA  
AGTCAGGGCCTGCGTGCCGGTATGGTAGCGGGTGTTATCGTTAACCGCACCCAGCAAGAGCT  
GCCGAATGCTGAGTCGATGAAACAAACCGAAAGCCATATGGTGAAAATCGTGGTGGAAGCG  
GCGCGTCGTCTGCTG

>Rd5BB\_UP

ATGTCCGAATCTGATGTTTTTCATATGGGCCTCACTAAAAACGATTTACAAGGGGCTACGCT  
TGCCATCCTGCCTGGCGACCCGGATCGTGTGGAAAAAATCGCCGCGCTGATGGATAAGCCG  
GTTAAGCTGGCATCTTGGCGCGAATTCACCTACCTGGCGTGCAGAGCTGGATGGTAAACCTGT  
TATCGTCTGCTCTACCGGTATCGGCGGCCCGTCTACCTCTATTGCTGTTGAAATTCTGGCACA  
GCTGGGCATTTCGCACCTTCCTGCGTATCGGTACAACGGGCGCTATTCAGCCGCATATTAATG  
TGGGTGATGTCCTGGTTACCACGGCGTCTGTCCGTCTGGATGGCGCGAGCCTGCACTTCGCA  
CCGCTGGAATTCCCGGCTGTCGCTGATTTTGAATGTACGACTGCGCTGGTTGAAGCTGCGAA  
ATCCATTGGCGCGACAACCTCACGTTGGCGTGACAGCTTCTTCTGATACCTTCTACCCAGGTCA  
GGAACGTTACGATACTTACTCTGGTCGCGTAGTTCGTCACCTTAAAGGTTCTATGGAAGAGT  
GGCAGCGTATGGGCGTAATGAACTATGAAATGGAATCTGCAACCCTGCTGACCATGTGCGC  
AAGTCAGGGCCTGCGTGCCGGTATGGTAGCGGGTGTTATCGTTAACCGCACCCAGCAAGAG  
CTGCCGAATGCTGAGTCGATGAAACAAACCGAAAGCCATATGGTGAAAATCGTGGTGGAAG  
CGGCGCGTCGTCTGCTG

>Final variant\_UP

ATGTCCGAATCTGATAGTTTTTCATATGGGCCTCACTAAAAACGATTTACAAGGGGCTACGCT  
TGCCATCCTGCCTGGCGACCCGGCTCGTGTGGAAAAAATCGCCGCGCTGATGGATAACCCGG  
TTAAGCTGGCAAGCTGGCGCGAATTCACCTACCTGGCGTGCAGAGCTGGATGGTAAACCTGTT  
ATTGTCTGCTCTACCGGTATCGGCGGCCCGTCTACCTCTATTGCTGTTGAAATTCTGGCACAG  
CTGGGCATTTCGCACCTTCCTGCGTATCGGTACAACGGGCGCTATTCAGGGGCATATTAATGT  
GGGTGATGTCCTGGTTACCACGGCGTCTGTCCGTCTGGATGGCGCGAGCGGTCACTTCGCAC  
CGATGGAATTCCCGGCTGTCGCTGATTTTGAATGTACGACTGCGCTGGTTGAAGCTGCGAAA  
TCCATTGGCGCGACAACCTCACGTTGGCGTGACAGCTTCTTCTGATACCTTCTACCCAGGTCAG  
GAACGTTACGATACTTACTCTGGTCGCGTAGTTCGTCGCTTTCAGGGTTCTATGGAAGAGTG  
GCAGGAAATGGGCGTAATGAACTATGAAATGGAATCTGCAACCCTGCTGACCATGTGCGCA  
AGTCAGGGCCTGCGTGCCGGTATGGTAGCGGGTGTTATCGTTAACCGCACCCAGCAAGAGCT  
GCCGAATGCTGAGTCGATGAAACAAGTTGAAAGCCATATGGTCAAAAATCGTGGTGGAAGCG  
GCGCGTCGTCTGCTG

>pyruvate\_oxidase\_PO3

ATGAGTGATAATAAAAATCAACATCGGTCTGGCGGTGATGAAAATTCTGGAAAGTTG  
GGGCGCAGATACCATTTATGGCATTCCGAGCGGCACCCTGAGTAGCTTAATGGATGC  
CATGGGTGAAGAAGAAAACAATGTTAAGTTCCTGCAGGTGAAGCATGAAGAAGTGG  
GCGCAATGGCAGCCGTTATGCAGAGTAAATTTGGCGGTAATCTGGGTGTGACCGTTG  
GTAGTGGCGGTCTTGGTGCAAGTCATCTGATTAATGGCCTGTATGATGCCGCAATGG  
ATAATATTCCGGTTGTGGCAATTCTGGGTAGCCGTCCTCAGCGTGAAGTGAATATGG  
ATGCATTTTCAGGAACTGAACCAGAATCCGATGTATGATCATATCGCCGTTTACAATC  
GCCGTGTGGCCTATGCAGAACAGCTGCCTAAACTGGTGGATGAAGCCGCCCGTATG  
GCCATTGCTAAACGCGGTGTGGCAGTTCTGGAAGTTCGGGGTGATTTTGGCAAAGTG  
GAAATTGATAACGACCAGTGGTACAGTAGCGCAAATAGCCTGCGCAAATATGAACC  
GATTGCCCGGCAGCACAGGATATTGATGCAGCTGTGGAAGTCTGTAATAATAGTA  
AACGCCCGGTGATTTACGCAGGTATTGGTACCATGGGCCATGGCCCTGCAGTTCAAG  
AACTGGCTCGTAAAATTAAGGCACCGGTGATTACCACCGGTAAAAATTTTGAAACCT  
TCGAGTGGGACTTCGAAGCCCTGACCGGTTCAACCTATCGTGTGGGTGGAAACCGG  
CAAATGAAACCATTCTGGAAGCCGATACCGTTCTGTTTGCAGGCAGCAATTTCCGT  
TTAGCGAAGTGGAAGGCACCTTTCGTAATGTTGATAATTCATCCAGATCGACATCG  
ACCCGGCAATGCTGGGTAAACGCCATCATGCAGATGTGGCAATTCTGGGTGATGCC  
GGCCTGGCAATTGATGAAATTCTGAATAAGGTGGACGCCGTGGAAGAAAGCGCCTG  
GTGGACCGCAAATCTGAAAAATATTGCAAACCTGGCGCGAGTATATCAACATGCTGG  
AAACCAAAGAGGAGGGTGTCTGCAGTTTTATCAGGTTTATAACGCGATCAACAAC  
CACGCCGATGAAGATGCAATTTATAGCATTGACGTGGGCAATAGCACCCAGACCAG  
CATTTCGTCATCTGCACATGACCCCGAAAAATATGTGGCGCACCCAGCCCGCTGTTTGC  
CACCATGGGTATTGCAATTCGGGTGGCCTGGGTGCAAAAAATACCTATCCGGATCG  
TCAGGTGTGGAATATTATTGGCGATGGCGCCTTTAGTATGACCTATCCGGATGTTGT  
TACCAATGTTTCGCTATAATATGCCGTTATCAACGTGGTTTTTCAGTAATACCGAGTA  
CGCATTTATCAAGAACAAGTACGAGGACACCAACAAAAACCTGTTTGGTGTGGATTT  
CACCGATGTGGATTATGCCAAAATCGCCGAAGCACAGGGTGCAAAGGCTTTACCG  
TGAGTCGCATTGAAGATATGGATCGTGTTATGGCCGAAGCCGTGGCCGCAAATAAA  
GCCGGTCATACCGTTGTGATTGATTGTAATAATCACCCAGGACCGTCCGATTCCGGTT  
GAAACCCTGAAACTGGATAGCAAACCTGTATAGTGAGGACGAAATCAAGGCATATAA  
GGAACGTTACGAGGCAGCAAATCTGGTGCCGTTTTCGTGAATATCTGGAAGCCGAAG  
GTCTGGAAAGCAAATATATTAAG

>pyruvate\_oxidase\_PO5

ATGACCCAGGGTAAAATTACCGCAAGTGCCGCAATGCTGAATGTGCTGAAAACCTG  
GGGCGTTGATACCATTTATGGTATTCGAGTGGTACCCTGAGCAGCCTGATGGATGC  
CTTAGCAGAAGATAAAGATATCCGCTTTCTGCAGGTGCGCCATGAAGAAACCGGCG  
CATTAGCCGCAGTGATGCAGGCAAATTTGGTGGCAGCATTGGTGTTCAGTGGGTA  
GCGGTGGTCCGGGTGCAACCCACCTGATCAATGGTGTTCATGATGCCGCCATGGATA  
ATACCCGTTTCTGGCCATTCTGGGTAGTCGCCCTGTGAATGAACTGAATATGGATG  
CATTCCAGGAGCTGAATCAGAATCCGATGTATCATGGTATCGCCGTTTATAATAAGC  
GCGTTGCATACGCTGAACAGCTGCCGAAAGTGATTGATGAAGCATGCCGTGCAGCC  
GTGAGCAAAAAAGGCCCTGCAGTGGTTGAAATTCGGTTAATTTGGCTTCCAGGAA  
ATCGATGAGAACAGTTATTACGGCAGCGGTAGTTATGAACGTAGCTTTATTGCCCG



GCCCTGAATGAAGTGGAAATTGATAAAGCAGTGGAGATCCTGAACAAGGCAGAACG  
CCCGGTGATTTATGCAGGCTTTGGTGGCGTGAAAGCAGGTGAAGTGATTACCGAACT  
GAGCCGCAAATTAAGCCCCGATTATTACCACCGGCAAAAATTTTGAGGCCTTTGA  
ATGGAACTACGAGGGACTGACCGGCAGTGCATATCGTGTGGGTTGAAACCGGCAA  
ATGAAGTGGTGTGTTGAAGCCGATACCGTGCTGTTTCTGGGTAGCAATTTCCGTTTGC  
CGAAGTTTATGAGGCATTTAAAAACACCGAGAAGTTCATCCAGGTGGATATTGATCC  
GTATAAGCTGGGCAAACGTCATGCACTGGATGCAAGTATTCTGGGTGATGCAGGTC  
AGGCCGCAAAGCAATTCTGGATAAAGTTGATGCCGTGGAAAGCACCCCGTGGTGG  
CGTGCAAATGTGAAAAATAATCAGAACTGGCGCGACTATATGAACAACTGGAAGG  
CAAACCGAGGGTGAAGTGCAGCTGTATCAGGTTTATAATGCCATTAACAAGCACG  
CAGACCAGGATGCAATTTATAGTATTGACGTGGGCAACAGCACCCAGACCAGTACA  
CGTCATCTGCACATGACCCCGAAAAATATGTGGCGTACCAGCCCGCTGTTTGCAACC  
ATGGGTATTGCCCTGCCGGGCGGTATTGCTGCAAAAAAAGATAATCCGGAGCGTCA  
GGTTTGGAAATATTATGGGTGATGGTGCCTTTAACATGTGCTATCCGGATGTGATTAC  
CAATGTTTCAGTACAATCTGCCGGTTATTAACGTTGTTTTTCAGCAATGCCGAGTACGC  
ATTTATTAAGAACAAGTACGAGGACACCAACAAGCATCTGTTTGGTGTGATTTCAC  
CAACGCCGATTATGCCAAAATTGCCGAAGCACAGGGCGCAGTTGGTTTTACCGTGG  
ATCGCATTGAAGATATTGACGCAGTGGTTGCCGAAGCAGTGAACTGAATAAAGAA  
GGTAAGACCGTGGTGAATTGACGCCCGCATTACCAGCATCGCCCTTTACCTGTGGAA  
GTGCTGGAAGTGGATCCGAAACTGCATAGTGAAGAAGCAATTAAGGCCTTTAAGGA  
GAAGTACGAAGCCGAAGAAGTGGTGCCGTTTCGTCTGTTTCTGGAAGAAGAAGGCC  
TGCAGAGTCGCGCAATTA

>pyruvate\_oxidase\_PO6

ATGAGTGATAAAAAAATCAGCGCGGGCCTGGCAGCACTGAAAGTTATGGAAGGTTG  
GGGTATTGATACCATGTATGGTATTCCGAGCGGTACCCTGAGCGGTTTAATGAATGC  
AATGGGCCATCCGGAATAAAGTTAAATTCATCCAGGTGAAGCACGAGGAAATTG  
GCGCAATGGCAGCCGTTATGCAGTATAAATTTGGTGGCAATATCGCGGTTACCGTTG  
GTAGCGGTGGCCCTGGTGCACCCACCTGATCAATGGTCTGTATGATGCCTATATGG  
ACCATATTCCGGTCTGGCAATTCTGGGTAGTAAACCGGTTTCGCGAACTGAATATGG  
ATAGTTTTTCAGGAACTGAACCAGAACCCGATGTATGATCATATTGCCGTTTACAACC  
GCCGCGTTGCAACCGCAGAACAGTTACCTCATCTGGTGGATGATGCAATTCGCACCG  
CCATTAGTAAACGCGGTGTGGCTGTTCTGGAAGTTCGCGCAGATTTTGGTTTTGCCG  
AACTGGATGCCGAAAGCATTATAGCACCCCGCTGTATAGTAGTGGCACCAAATATA  
AACGCTACAAGCCGTTGCACCGGAAGCCGAGGAAATTGATGAAGCCGTGGAAATT  
CTGAAGGCAAGCGAACGTCCGGTTATTTATGCCGGTTTTGGTACCAGGGCCATGGT  
GATCTGGTGGAGAAGTGAAGTGCAAAATTAAGCACCGGTGATTACCACCGGTAA  
AAATTTTGATAACTTCAACTGGGACTTCGAGGCACTGACCGGCTCAGCATTTCGCGT  
TGTTTGGAAACCGGCCAATGAAGCCGTGCTGGAAGCCGACACAGTTCTGTTTATTGG  
CACCAATTTCCCGTTTGTAGTGAGGTGGAAGGCACCTTTCGCAATGTTAAAAAATTCAT  
CCAGATCGACGCAAACCCGGATATGCTGGGTAAACGTCATGAAACCGATGTTGCCA  
TTCTGGCAGATGCCGGTGAAAGCCTGAAAGCCCTGCTGGCAAAAGTTGAACCGGTG  
GCAGATAACCCGTGGTGGCAGGCAAATATTAATAATGTGCAGAACTGGCGCGACTA  
TATGAATAAACTGGAACAGAAGACCGAGGGCCCGCTGCAGGCATACCAGGTGTACA  
ATGCAATTAATAAGCTGGCCGATGAGGATGCCATTTTGTAGTACCAGTGTGGGTGATG  
TTACCAGCTGAGCACCCGTCATCTGCACATGAATCCGAAACAGATGTGGCGTACCA

GTCCGCTGTTTGCAACCATGGGCATTGCCCTGCCGGGTGGTATTGGAGCAAAAAATA  
TTACCCGGACCGTCAGGTTTGGGAATATTATTGGCGATGGCGCATTAGCATGACCT  
ATCCGGATGTTGTTACCAAGTGTTCGTTATGATATGCCGATGATTAACGTGATCTTCAC  
CAATACCGAGTACGGTTTTATCAAGAACAAGTACGAGGACACCAACGAATATAACT  
TCGGCGTGGATTTTACCGATGTGGATTATGCCAAAGTGGGCGAAGCCCAGGGCGCA  
ATCGGTCTGACCGTGAACAGAATTGAAGATATTGACCGCGTGATGCAGGAAGCCGT  
GGATTATTATAAACAGGGTCGCGTGTGTTGTGGTTGATGCAAAAATTACCAAGGACCG  
CCCGATTCCGGTTGAAACCCTGAAACTGGATACCAATCTGTATAGTGAGGACGTTGT  
TAAGGCCTATAAGGAAAAATACGAGGCAGAAGCACTGGTTCGTTTCGCGAATTTCT  
GGAAGGTGAAGGTCTGAAAAGTATCTATATCAAGGAGGACAACGACAACAAGTTCA  
GTTTTAA

>Macaca mulatta MTAP

ATGCACCATCATCATCACCATGGCGGTTCCGGTGTCTAGCGGAACAACAACACTACGGC  
TGTAAGATCGGCATTATTGGCGGTACTGGTCTGGATGATCCGGAAATCCTAGAAGG  
CCGTACCGAGAAATACGTGGACACCCCGTTCGGTAAGCCGTCTGATGCACTGATCCT  
GGGTAAAATCAAAAATGTTGACTGTGTTTTGCTGGCGCGTCACGGCCGTGAGCATA  
CATTATGCCAAGTAAAGTTAATTATCAAGCGAACATTTGGGCACTGAAGGAGGAGG  
GCTGCACCCATGTCATTGTCACCACTGCGTGCAGTTCTCTGCGTGAGGAGATCCAGC  
CGGGTGATATCGTGATAATCGACCAGTTCATCGACCACGACCATGCGTCCGCAA  
AGCTTTTATGACGGTTCCCATAGCTGTGCTCGCGGGGTGTGCCACATCCCTATGGCG  
GAGCCGTTTTGTCCGAAAACCAGAGAGGTGCTTATCGAAACTGCGAAGAAACTGGG  
CTTGCCTGCCACAGCAAGGGCACCATGGTTACCATTGAAGGTCCGCGCTTTAGCAG  
CCGTGCTGAAAGCTTCATGTTTCGTACGTGGGGTGCAGGATGTCATCAACATGACCAC  
CGTTCGGGAAGTTGTTTTAGCCAAGGAAGCGGGTATCTGCTACGCGTCCATTGCCAT  
GGCTACCGATTACGACTGCTGGAAAGAGCACGAAGAGGCTGTGAGCGTAGACCGCG  
TGCTCAAGACGTTGAAAGAGAACGCCAATAAAGCAAAGAGCCTGTTGCTGACCACG  
ATTCCGCAAATTGGCTCGACCAGTGGTCGGAAACCCTTCACAACCTGAAGAACAT  
GGCGCAGTTCTCTGTGTTGCTGCCGCGTCATTAA

>Saccharolobus solfataricus MTAP

ATGCACCATCATCATCACCATGGAGGGTCAGGCAACCCAGTTCATATTCTGGCGAAA  
AAGGGCGAGGTTGCGGAACGTGTTCTTGTAGTTGGCGATCCGGGTCGTGCGCGTCTG  
TTGTGACCCCTGCTGCAGAATCCGAAACTGACCAACGAGAACCGTGGTTTTCTGGTG  
TATACCGGTAAATAACAATGGCGAAACCGTTTCGATCGCGACGCACGGCATTGGCGG  
TCCGAGCATCGCAATTGTCTTAGAGGAACTGGCGATGTTGGGTGCTAATGTGTTTCAT  
CCGCTATGGTACAACCGGCGCACTGGTGCCGTACATCAACCTGGGTGAGTATATCAT  
CGTCACCGGTGCTAGCTATAACCAAGGTGGCCTGTTCTACCAGTACCTGCGCGATAA  
TGATGTGTTGCCAGCACCCCGGACTTCGAACTCACGAACAAGCTGGTAACGAGCTT  
TAGCAAACGTAACCTGAAATACTACGTGGGTAACGTTTTCTCCAGCGACGCGTTTTA  
TGCCGAAGATGAAGAGTTTGTAAAGAAGTGGAGCTCCCGCGGTAATATTGCGGTGG  
AAATGGAGTGCAGCAACGTTGTTACCCCTCTCCAAGGTGAAGGGATGGAAAAGCGCG  
ACCGTCCCTGGTGGTGTCCGACAACCTGGCTAAGGGCGGTATCTGGATTACCAAGAA  
GAGTTGGAGAAATCTGTCATGGACGGCGCCAAGGCGGTTCTGGATACCTTAACTTCT  
TAA

>Mus musculus MTAP

ATGCACCATCATCATCACCATGGCGGTAGCGGGCCTTCAGGAAGTGCATGTACAGC  
GGTAAAGATCGGCATCATTGGTGGCACCGGTCTGGATGACCCGGAAATTCTGGAAG  
GCAGAACTGAAAAATATGTTGACACCCCATTCGGCAAGCCGTCTGATGCGCTGATTC  
TGGGCAAAATTA AAAACGTCGACTGCGTGTGCTCGCGCGCCATGGTCGTCAGCATA  
CCATTATGCCGAGCAAGGTGAACTACCAGGCGAATATTTGGGCACTTAAGGAGGAG  
GGCTGCACCCACGTGATCGTGACGACCGCGTTCCTGCGCGAAGAGATCCA  
ACCAGGTGATATGGTTATCATCGACCAGTTCATCGATCGTACGAGCTTGCGTCCGCA  
AACCTTTTACGACGGCAGCCATTGTAGCGCACGCGGTGTCTGTCACATTCCAATGGC  
AGAACCGTTTTGCCGAAAACCCGTGAAGTGTTGATCGAAACGGCCAAAAGCTGG  
GTCTCCGCTGCCACAGCAAGGGCACCAATTGTCACAATCGAGGGTCCGCGTTTTTCT  
CTCGTGCGGAAAGCTTAATTTCCGCACTTGGGGTGCTGACGTTGTTAATATGACCA  
CGGTGCCGGAGGTAGTTTTGGCGAAAGAGGCGGGTATCTGCTATGCTAGCATCGCC  
ATGGCTACCGATTACGACTGTTGGAAAGAGCACGAAGAGGCCGTTTCCGTGGATGG  
GGTTCTGAAAACGATGAAGGAGAACGCGAACAAAGCTAAGTCGTTGCTGCTGACCA  
CCATCCCGCAAATTGGCTCTATGGAATGGAGCGAAACCCTGCGTAATCTGAAGAAC  
ATGGCACAGTTCAGTGTCTGCCTCCGCGTCACTAA

>Trichomona vaginalis PNP

ATGCACCATCATCATCACCATGGCGGTAGCGGGCAACACCCACAATTCAGCTCA  
AGTAGGCGACTTTGCAGAAACGGTCTGATGTGTGGCGATCCGCTGCGTGCGAAGCT  
GATTGCGGAGACTTACTTGGAGAACCCGAAATTGGTTAATAACGTGCGTGGTATTCA  
AGGTTATACCGGTACATAAAGGGCAAACCGATCAGCGTAATGGGCCATGGTATGG  
GTCTGCCGTCCATCTGCATTTATGCCGAGGAGTTGTACAGCACCTACAAAGTTAAGA  
CCATTATCAGAGTTGGCACGTGCGGGCGGATTGACATGGACATCCACACCCCGTGATA  
TCGTTATTTTACCTCTGCGGGCACCAATTCAAAATCAACCGCATCCGCTTCATGGA  
CCACGACTACCCGGCTACCGCGTCGTTTCGACGTGGTCTGTGCTCTGGTCGATGCAGC  
CAAAGAGTTAAATATTCGGCGAAGGTGGGTAAGGGTTTTAGCACTGACTTATTCTA  
TAACCCACAGACCGAACTGGCTCAGCTGATGAATAAATTCCACTTTCTGGCTGTGGA  
AATGGAAAGCGCGGGTCTGTTCCCGATCGCGGATCTTTATGGTGCGCGTGCGGGGTG  
CATCTGCACCGTGAGCGATCACATTCTGCATCATGAAGAAACGACCCGAGAGGAAC  
GTCAAACCTTTCCAGAACATGATGAAGATCGCCCTGGAGGCAGCCATCAAATTGT  
AA

>Plasmodium falciparum PNP

ATGCACCATCATCATCACCATGGCGGTAGCGGGGATAATTTACTAAGGCACCTGAAA  
ATATCGAAGGAGCAGATTACCCCGTGTGTTGGTTGTTGGTGACCCGGGTCGTGTT  
GACAAGATCAAGGTGGTATGCGATAGCTATGTCGACCTAGCGTATAACCGCGAGTA  
TAAGAGTGTTGAGTGCCATTACAAAGGTCAAAAATTCCTGTGCGTTAGCCACGGGGT  
GGGCTCCGCAGGCTGCGCGGTCTGTTTTGAAGAATTGTGTCAGAACGGCGCGAAGG  
TGATCATTCGTGCAGGTAGCTGTGGTTCCTGCAACCGGATCTTATCAAACGTGGTG  
ACATCTGCATTTGTAATGCTGCGGTGCGCGAGGATCGTGTGTCTCACCTGCTGATTC  
ACGGCGACTTCCGGCAGTTGGCGACTTCGACGTTTACGATACCTTGAACAAGTGCG  
CGCAGGAGCTGAACGTTCCGGTTTTTAACGGCATTAGCGTTTCTAGCGATATGTATT  
ACCCGAATAAGATCATCCCGAGCCGTCTGGAAGACTACAGCAAAGCGAATGCGGGCT  
GTGGTGCAGATGGAACCTCGCGACTTTAATGGTTATCGGCACCTTGCGCAAAGTGAAA

ACCGGTGGTATTCTGATCGTGGATGGTTGCCCGTTTAAATGGGATGAAGGCGATTTC  
GACAACAACCTGGTGCCACATCAACTGGAAAATATGATTAAGATCGCCCTGGGTGC  
CTGCGCCAAGCTGGCGACTAAGTACGCTTAA

>Escherichia coli TP

ATGCACCATCATCATCACCATGGCGGTAGCGGCTTTCTAGCTCAAGAAATTATAAGG  
AAAAAGCGCGACGGCCATGCCTTAAGCGACGAGGAAATCCGCTTCTTCATCAACGG  
TATCAGAGACAACACCATTTCCGAGGGTCAGATCGCAGCTCTCGCTATGACCATTTT  
TTTTCATGATATGACGATGCCGGAACGTGTTTCTCTGACCATGGCGATGCGTGACTC  
TGGCACCGTGCTCGATTGGAAAAGCCTTCACCTGAATGGTCCGATTGTGGATAAGCA  
CAGCACGGGCGGCGTGGGTGATGTGACCAGTCTGATGCTGGGTCCGATGGTGGCGG  
CATGTGGTGGTTATATCCCGATGATTTCCGGCCGTGGTCTGGGTCATACCGGTGGGA  
CCCTGGACAAGCTGGAATCCATCCCGGGTTTCGATATCTTTCCAGATGATAACCGTT  
TCCGCGAGATCATCAAAGACGTGCGCGTGGCCATCATTGGCCAAACCAGCAGCTTG  
GCACCGGCAGACAAACGTTTCTACGCGACCCGTGATATTACCGCGACCGTTGATAGC  
ATTCCGTTGATCACTGCGAGCATCCTGGCGAAGAAATTGGCCGAGGGCCTGGACGC  
GCTGGTTATGGATGTTAAGGTGGGCTCCGGCGCGTTTATGCCTACCTATGAACTGAG  
CGAGGCGCTGGCGGAGGCCATTGTTGGCGTGGCCAATGGTGTGTTGTGAGAACAA  
CCGCACTGCTGACTGACATGAATCAGGTTCTGGCTTCGAGCGCAGGTAACGCAGTCG  
AGGTTCCGGGAAGCGGTCCAGTTTCTGACGGGTGAATATCGTAATCCGCGTCTGTTTG  
ATGTTACCATGGCCCTTTGCGTGGAGATGCTCATATCTGGTAAGTTGGCTAAAGACG  
ACGCGGAGGCACGTGCAAAGCTGCAGGCGGTTCTGGACAACGGCAAGGCGGCCGA  
GGTTTTTGGTCGCATGGTTGCCGCTCAGAAAGGTCCAACGGACTTCGTGGAAAATA  
TGCGAAATACCTGCCGACTGCGATGTTGACGAAAGCGGTGTACGCGGACACCGAAG  
GTTTCGTGAGCGAGATGGATAACCCGTGCGTTGGGCATGGCGGTGGTTCGCTATGGGTG  
GCGGCCGTCGTCAGGCGTCCGATACGATTGATTACAGCGTTGGATTACCGACATGG  
CGCGCTTGGGCGACCAAGTTGACGGCCAACGTCCGCTGGCGGTAATCCACGCTAAG  
GACGAGAACAACCTGGCAAGAAGCGGCAAAGGCGGTGAAAGCGGCGATCAAGTTAG  
CTGATAAGGCTCCGGAATCCACCCCGACCGTTTACCGCCGTATTTCTGAATAA

>Rattus norvegicus MTAP

ATGCACCATCATCATCACCATGGCGGTAGCGGCGAAGTAGGAGGGAGGTGTTGGCT  
AATATTGCTCGCGCTGGGCTTGATCGCGCCACAAAGCCATTGGGTCCGGCGTTGAG  
ACCGGCAGTCGATTTTCCGGGCGCAGATATGGCTTCCGGTAGCGCCTGCACCGCTGT  
GAAAATCGGCATCATTGGTGGTACTGGTCTGGATGATCCGGAGATCCTGGAAGGCC  
GTACCGAAAAGTACGTGGACACCCCGTTCGGCAAACCGTCGGACGCACTGATTCTG  
GGCAAGATCAAAAACGTTGATTGCGTCCTCTTGGCGAGCATGTATGTGTTGGACCGT  
ATGTGTGAATTCCCTGTTACTGCCGTTCTGCGTTCAACTGAACAGCCTACACGAGATT  
CCACCGGGTTCTTCTTGTACATACCTCCTACCTGTTTGCCTTTGTTGCGCGTTGGGAAC  
GCCGTGTTTCGTTGGCTGGCTCGTGTTTTATGCGAGCGCGCTTCGTTCCGAGCAGCG  
CGTCTACGTCCGTGCAGTGGAAGGAGACGAAACACTCGAAAGAAATCACCCAGCGT  
AGCAAGGCCTCTCGCTTCTCCACCACGGTGCAACAACAGGCGATTTCGTGAGGAGTG  
CCAGACCTCGCTGCGTCCGCAAACCTTTTATGACGGCAGCCATTGTAGCGCGCGTGG  
TGTTTGTACATCCCGATGGCAGAACCCTTCTGCCCGAAAACCCGTGAGGTGCTGAT  
CGAGATGGCGAAGAAGCTGGGTTTTCGCTGCCACAGCAAGGGTACTATCGTGACCA  
TTGAAGGTCCCTCGCTTCAGCTCTCGCGCGGAGAGCTTTATTTTTTCGCACCTGGGGTGC

CGACGTGATCAACATGACCACGGTACCGGAAGTTGTTCTGGCTAAGGAGGCGGGTC  
TGTGCTACGCATCCATTGCTATGGCCACCGATTACGACTGCTGGAAGGAGCACGAAG  
AAGCAGTCAGCGTGGACGGCGTCCTTAAGACCATGAAAGAGAACGCGAATAAAGCC  
AAGAGCTTGTTGTTGACCACAATTCCGCAGATTGGCAGCATGGAATGGTCAGAAACT  
CTGCGTAATCTGAAGGTGGTGGCAGTTAAGCTGTATGGAGAAAAAAAACGTGAACT  
GCACCAGAAAAGCTCCGGCGGTATGCTCCAAATGCTGGCCAGCTCCAAGGACTCGG  
GTCAGCTGGCGGAGTAA

>*Aeropyrum pernix* MTAP

ATGCACCATCATCATCACCATGGCGGTAGCGGCAGGAAACCCGTACACCTAGAAGC  
TGGACCAGGTGACGTGGCTCCGCTGGTGGTGGCGGTGGGTGACCCAGGTCGTGCGG  
AGCGCCTGGCCACGGGCTTGCTGGAAGACGCACGCTTGGTCTCCAGCGCGCGTGGC  
CTTAAGGTGTACACCGGCTCCTTTAACGGTTCTGAAGTGACCATTGCTACGCATGGT  
ATTGGTGGTCCGAGCGCGGCCGTTGTATTTGAAGAACTGCGTATGCTGGGCGCTGAG  
GTTTTGGTTCGTTTGGGCACCAGCGGCGGCCTCTCAAAGATCTGCGTTTGGGTGAC  
GTTGTGGTGGCGGCGGGAGCCGGTTGTTACTGGGGTTCCGGTGGGTTCGATCCAGTAC  
GCAGGTGAGCGTCCGATGTGCCTGCCGGCGAGCCCGGATCCGATCCTGACCGCAGG  
CATCTATCGTGGCCTGTCCTCTCGTCTGGGCGATCGTGTTGTGTTGGCGCCTGTTATG  
AGCAGCGATGCCTTTTATGCGGAGACTCCGGAAGCAGCGGGCCGCTGGCGTAGCCT  
GGGTATGGCAGCCGTGAGATGGAGCTGCACACCCTGTTTCAGCATCAGCTGGATCC  
GTGGTTTCCGCTCTGCTGGTGTCTGATTGTTAGCGACCTGTTACTACCGGAAGGTTT  
CAAACGCATTACCCCGGGTGAATTAGCGCGCCGTGAAGTTGAGGTCGGTAGAGCAC  
TGCTGGAGGTCTTAACCGGTGGCGTGTA

>*Pyrococcus furiosus* MTAP

ATGCACCATCATCATCACCATGGCGGTAGCGGCCCCAAAATAGGGATAATTGGAGG  
TTCAGGCGTTTACGGCATTTTTGAACCGAAGGAGACGGTGAAAGTGCACACCCCGTA  
CGGCAGACCTAGCGCTCCGGTAGAAATTGGTGAGATCGAGGGCGTGGAGGTGGCCT  
TTATTCCGCGTCATGGTAAATATCACGAGTCCCGCCGCACGAGGTTCCGTATCGTG  
CGAACATCTGGGCACTGCATGAACTGGGTGTTGAACGTGTTATCGCGGTCAACGCTG  
TGGGCAGCTTAAAGGAGGAGTACAAACCGGGTGATATTGTTATTATCGACCAGTTCA  
TTGACTTCACCAAAAAACGTGAGTACACCTTTTATAACGGTCCGCGTGTGGCGCACA  
TCAGCATGGCGGACCCGTTTTGCCCGGAATTGCGCCGTATTTTCATCGAAACTGCGA  
AAGAGCTGAATTTGCCGGTGCATGAGAAGGGTACATACATCTGTATCGAGGGTCCG  
CGTTTTTCGACCCGTGCGGAATCTCGTATGTTCCGCCAATTCGCAGATGTAATTGGC  
ATGACCCTGGTCCCAGAGGTGAACCTGGCACGTGAACTGGGCATGTGCTATGTTAAT  
ATCTCCACGGTTACCGATTACGACGTGTGGGCGGAGAAGCCGGTTCGATGCGCAAGA  
AGTTTTGCGCGTCATGAAAGAAAACGAAGAAAAGGTTTCAGAACTGCTGAAGCGCG  
CCATCCCAAAGATCCCCGAAGAGCGCAAATGCGGTTGTGCTGACGTTCTGAAGACC  
ATGTTTGTTTAA

>*Saccharomyces solfataricus* PNP

ATGCACCATCATCATCACCATGGCGGTAGCGGCATAGAGCAAATGAAAAAGCTTC  
AATTGGCATCATTGGCGGTTCTGGCCTGTACGACCCGGGTATTTTCAGCGAAAGCAA  
AGAAATCAAGGTGTACACCCCGTATGGTCAGCCGAGCGACTTCATCACCATTGGTAA  
AATTGGAAACAAAAGCGTGGCGTTTCTGCCGCGTCATGGTTCGCGGTACCGTATTCC  
ACCGCATAAAATTAATACTATCGTGCTAATATCTGGGCACTTAAGGAGCTGGGGGTGCG  
TTGGGTTATCAGCGTCTCCGCTGTGGGTTCTTGGCGCATGGACTACAAGTTAGGTGA  
TTTCGTGATCCCGGATCAATTTATCGATATGACCAAAAACCGCGAGTATAGCTTTTT

CGACGGCCCTGTTGTCGCGCACGTGTCTATGGCCGATCCGTTCTGCAATAGCCTGCG  
TAAACTCGCGATTGAAACCGCGAAAGAGCTGAACATCAAACCCACGAAAGCGGTA  
CGTACATTTGTATCGAAGGTCCGCGTTTCTCGACCCGTGCGGAGTCAAGAACGTGGC  
GTGAAGTCTACAAGGCAGACATCATCGGCATGACCCTGGTTCCGGAGGTTAATCTGG  
CCTGCGAAGCACAGATGTGTTATGCCACCATTGCGATGGTTACCGACTATGATGTAT  
TTGCAGAGATCCCGGTTACTGCGGAAGAAGTTACTCGCGTGATGGCGGAGAACC  
GAAAAGGCGAAAAAGTTGCTGTACGCGCTGATTCAAAAAGTCCCGGAGAAGCCGGA  
GGAGGGCTCTTGACGCTGCTGCAACTCCCTGAAGACGGCTTTGGTTTAA

>Plasmodium voelii

ATGCACCATCATCATCACCATGGGGGATCAGGCGACGAAGAGCAGCGTCACATCAA  
GCTGTCTAAGAAACACGCGACCCAGTTGTATTGGTTGTTGGTGATCCGGGCCGCGT  
GGACAAAATTAAGGTTCTGTGCGATAGCTACGTGGACTTGGCGTGCAATCGTGAGTA  
CAAAGCGTTGAATGTCATTATAAAGGTCAAAAATTCCTGTGCGTGTCCCATGGTGT  
TGGTAGCGCAGGGTGCGCGATTTGTTTCGAGGAGCTGATTAACATTGGCGCGAAAGT  
CATTATCCGCGCAGGCTCTTGTGGTTCCCTGCAGCCGGAAGCATCAAGCGCGGTGA  
CCTGTGCGTTTGTAAATGCAGCGGTGCGTGAAGACCGTGTCAACCACATGATGATCCA  
CAGCGATTTCCCGGCTGTCGCCGACTATGAAGTTTATAGCACGTTGCTGAAGTGCGC  
TGAAGAGCTGAATGTAAAGGTGCACAACGGCATCTCGCTCAGCAGCGATCTGTACTA  
CCCGCATTCTATTATCCCGACCCGTTTACTGGATTACTCGAAAGCGAACGTGGCCGT  
GGTCGAGATGGAAGTGTCCACCCTGATGGTTATGGGTACTCTGAAGAAAGTAAAA  
CCGGTGGCATCTTTATCGTGGACGGCTGCCCGCTGAAGTGGGATGAGGGTGACTTTG  
ATAACGTTCTGGCGGCTGATAGATTGGAGAACATGATTAAGATCAGCCTTGAGGCCT  
GCGCGCGTTTGTCCGAAAAATATTA

>Homo sapiens TP

ATGCACCATCATCATCACCATGGCGGTAGCGGCGCAGCTCTAATGACACCCGGGAC  
TGGAGCTCCGCCAGCGCCTGGAGATTTTAGCGGCGAAGGTAGCCAGGGTCTGCCGG  
ATCCGAGCCCGGAGCCGAAACAGCTGCCGGAGCTTATCCGTATGAAACGTGACGGC  
GGCCGCCTGAGCGAAGCCGACATCCGCGGCTTCGTGGCCGCGGTGGTTAATGGATC  
GGCTCAAGGTGCGCAAATTGGTGCTATGCTGATGGCAATTCGCCTGCGCGGCATGGA  
CCTGGAGGAACTTCAGTTTTGACGCAGGCGCTGGCCCAATCTGGCCAACAGTTGGA  
ATGGCCTGAAGCCTGGCGTCAGCAACTGGTGGACAAGCACTCCACCGGTGGCGTTG  
GAGATAAGGTGTCCCTGGTTCTGGCGCCGGCGCTGGCTGCGTGTGGTTGCAAAGTGC  
CGATGATTTCCGGTTCGTGGTCTCGGCCACACCGGTGGCACCCCTGGACAAGCTGGAG  
AGCATCCCGGGTTTCAACGTGATCCAGTCCCCGGAGCAGATGCAGGTTCTCCTTGAT  
CAGGCAGGCTGCTGCATCGTGGGCCAATCCGAGCAGCTGGTTCGGGCAGATGGTATT  
TTGTACGCAGCGCGTGATGTTACCGCTACCGTTGACAGCTTGCCGCTGATCACCGCT  
AGCATTCTGAGCAAAAAGCTGGTCGAGGGTCTAAGTGCGTTGGTCGTGGACGTGAA  
ATTTGGTGGCGCGGCGGTGTTCCGAACCAGGAGCAAGCAAGAGAACTGGCTAAAA  
CCCTGGTCCGTGTCGGCGCCAGCCTGGGTTTAAAGATCGCCGCGGCGCTGACCGCA  
ATGGACAAGCCGCTGGGTGCTTGTGTTGGTCACGCACTGGAGGTTGAGGAGGCACT  
GTTATGCATGGATGGTGCGGGTCCGCCAGACCTGCGCGACCTGGTGACGACCCTGG  
GTGGCGCGTTGCTTTGGCTGTCCGGCCACGCGGGTACCCAAGCGCAGGGCGCGGCT  
CGCGTTGCGGCGGCTCTGGATGATGGTTCTGCGCTGGGGCGTTTTGAACGCATGCTG  
GCTGCGCAAGGCGTGGACCCGGTCTGGCTCGTGCGCTTTGCAGCGGCAGCCCGGC  
CGAGCGCAGACAAGTGTGCCGCGTGCTCGTGAACAAGAAGAGCTGCTGGCTCCGG  
CAGACGGCACGGTTGAACTGGTTCGTGCCTTGCCGCTTGCGCTCGTTCTGCATGAAT

TAGGCGCGGGTCGTAGCCGAGCGGGTGAACCGCTCCGCTTGGGCGTAGGTGCAGAA  
TTGTTGGTAGACGTTGGCCAGCGTCTGCGTCGCGGCACTCCGTGGCTGCGCGTGCAT  
CGTGATGGCCCGGCCCTGTCTGGTCCGCAGTCTCGTGCGCTTCAAGAGGCACTCGTC  
CTATCGGATCGCGCGCCGTTTCGCAGCGCCGTCGCCCTTCGCCGAGTTGGTCCTACCG  
CCACAGCAGTAA

>Homo sapiens UP

ATGGCGAGCGTGATCCCGGGCGAGCAACCGTAGCATGCGTAGCGACCGTAACACCTA  
CGTTGGCAAGCGTTTCGTGCACGTTAAAAACCCGTACCTGGACCTGATGGACGAGG  
ATATTCTGTATCACCTGGATCTGGGTACCAAGACCCACAACCTGCCGGCGATGTTTCG  
GCGATGTGAAATTTGTGTGCGTTGGTGGCAGCCCGAACCGTATGAAGGCGTTCGCGC  
TGTTTATGCACAAAGAAGTGGGCTTTGAGGAAGCGGAGGAAGACATCAAGGATATT  
TGCGCGGGTACCGACCGTACTGCATGTATAAAACCGGCCCGTTCTGGCGATCAGC  
CACGGTATGGGCATTCCGAGCATCAGCATTATGCTGCACGAGCTGATCAAGCTGCTG  
CACCACGCGCGTTGCTGCGATGTGACCATCATTCGTATCGGTACCAGCGGTGGCATT  
GGTATGGCGCCGGGTTCGTGTGGTTATCACCGACATTGCGGTTGATAGCTTCTTTAAA  
CCGCGTTTCGAGCAGGTGATCCTGGACAACATTGTTACCCGTAGCACCGAGCTGGAT  
AAGGAAGTGAAGCGAGGAAGTGTCAACTGCAGCAAAGAAATTCGGAACTTTCCGAC  
CCTGGTGGGTACACCATGTGCACCTACGACTTTTATGAGGGTCAAGGCCGTCTGGA  
TGCGCGCTGTGCAGCTTCAGCCGTGAAAAGAACTGGACTACCTGAAGCGTGCGT  
TTAAAGCGGGTGTGCGTAACATCGAGATGGGCATTTATAGCGTTTGCAGCATGTGCG  
GTCTGTGCGGTCTGAAGGCGGCGGTGGTTTTCGTTACCCTGCTGGACCGTCTGGACT  
GCGATCAGATCAACCTGCCGCACGATGTGCTGGTTGAATATCAGCAACGTCCGCAA  
CTGCTGATCAGCAACTTCATTCGTGCTGCTGTTGGGTCTGTGCGATTAA

>Schistosoma mansoni UP

ATGGCGACCGTTCAGCCGATCGTGAACAGCCACCTGAGCGAGCTGGACGAAGATGT  
GTTCCACCACTTCGGTTTTACCACCAAGAGCTTCGACTTTAAGGAGAAATTCGGCGA  
TGTTAAATTTGTTTTCGTGTGCGGTAGCAGCGGCCGTATCCACAACCTTTCGCGATTAG  
CATGGCGAAGCTGGCGGGTCTGGCGCTGCCGGTGGAAAACATCGCGGGCAGCCACG  
CGCGTTTCGTTCTGTACAAAGTGGACCACATTCTGTTTTCGGATCACGGTATGGGCA  
TCCCGAGCGCGCTGATTATGCTGCACGAGGTGACCAAGCTGCTGCACTATGCGGGTT  
GCAAAGACGTTCTGTTTATTCGTCTGGGTACCAGCGGTGGCCTGGGTGTTAAGCCGG  
GCACCATGTGCTGAGCGATCGTTGCGTTAACACCAAGCTGGAGCCGTACAACGAA  
CTGTGCATCCTGGGTAAACCGGTTTCGTGCTCAGACCATTGTTGACCTGAACACCGTG  
AACGAACTGAAGAACTGAGCGAGAACCTGAGCCTGGAATGCAGCGTGGTTGTGGG  
TGGCACCATCGCGGCGAACGACTTTTATGAGGAACAGGGTTCGTCTGGATGGCAGCA  
TTTGCACCTTCAGCAAAGAGGAGAACTGGCGTTTCTGCAAAGCGCGTACGAGCAC  
GGTATCCGTAACATGGAGATGGAAGGCACCGCGATTACCAGCCACTGCTATCTGAC  
CGGTCACCGTGCGATCCTGGTTTTCGCTGACCGCGGTGAACCGTCTGGAGGGTGACCA  
AATCACCATTAGCACCGATGAATTCACCCTGTTTTCGCGAGCGTCCGGGTCAACTGGT  
GGGCGAATACCTGAAACGTAACAACGGTATCATTGTTTCGTTAA

>Deinococcus geothermalis PNP

ATGGTTGCGCGTGTGCCGGCGCGTCCGTTTTCGAGCCCGCCGGCGACCTGGACCGT  
GTGAGCGTTCACCTGAACGCGCGTCCGGGCGAGATCGCGGAAACCGTTCGTGCTGCC  
GGGTGATCCGCTGCGTGCAGCACATTGCGGAGACCTTCTTTGAAAACCCGGTTCA  
ACACAACAGCGTGCCTGGCATGCTGGGTTTTACCGGCACCTACCGTGGTGTGCCGGT

TAGCGTGCAAGGTACCGGCATGGGTATCGCGAGCAGCATGATTTACGTTAACGAGC  
TGATCCGTGACTATGGCTGCCAGACCCTGATTCGTGTGGGTACCGCGGGCAGCTATC  
AACCGGACGTTACAGTGCCTGATCTGGTTCTGGCGCAGGCGGCGTGCACCGATAGC  
AACATCAACAACATTCGTTTCGGTCTGCGTAACTTTGCGCCGATCGCGGACTTCGAG  
CTGCTGCTGCGTGCCTACCAGATGGCGCGTGCCTGATTCGTGGTTTCGCGACCCACGTGGGC  
AACATTCTGAGCAGCGACACCTTTTATCAGGACGATCCGGAAAGCTACAAGCTGTG  
GGCGCAATATGGCGTTCTGGCGGTGGAGATGGAAGCGGCGGGTCTGTACACCCTGG  
CGGCGAAATATGGCGTTCGTGCGCTGACCATCCTGACCATTAGCGACCACCTGGTGA  
CCCGTGAGGAAACCACCGCGGAGGAACGTCAAACCACCTTTAACGGTATGATCGAA  
GTTGCGCTGGATGCGGCGCTGGGTCTGGCGGTGCCGAGCAACAGCATGTAA

>Bacillaceae sp. PNP

ATGAGCATCCACATTGAGGCGAAGCAGCAAGAGATCGCGGAAAAAATTCTGCTGCC  
GGGTGACCCGCTGCGTGCAGTACATCGCGGAGACCTTCCTGGAAGGCGCGACCT  
GCTATAACCGTGTTTCGTGGCATGCTGGGTTTTACCGGCACCTACAAGGGTCACCGTA  
TCAGCGTGCAAGGTACCGGCATGGGTGTTCCGAGCATCAGCATTACGTGAACGAA  
CTGATTCAGAGCTATCACGTGCAAACCCTGATCCGTGTTGGTACCTGCGGCGCGATT  
CAGAAAGACGTGAACGTTTCGTGATGTTATTCTGGCGATGAGCGCGAGCACCGACAG  
CAACATGAACCGTCTGACCTTCCGTGGCCGTGATTATGCGCCGACCGCGAACTTTC  
GCTGCTGCGTACCGCGTATGAGGTTGGTGCAGAAAGGGCCTGCCGCTGAAAGTGG  
GTAGCGTTTTACCGCGGATATGTTTTACAACGACGAGCCGGATTGGGAAACCTGGG  
CGCGTTATGGCGTGCTGGCGGTTGAGATGGAAACCAGCGGCGCTGTATACCCTGGCG  
GCGAAGTTCGGTCGTAAAGCGCTGAGCGTGCTGACCGTTAGCGACCACATCCTGAC  
CGGTGAAGAAACCACCGCGCAGGAGCGTCAAACCACCTTTAACGATATGATCGAGG  
TTGCGCTGGAAACCAGCGATTTCGTGTGGAATAA

## References

1. 3DM database panel designing toolbox. Bio-Product BV
2. Schrödinger Release 2020: Schrödinger, LLC, New York, NY
3. The PyMOL Molecular Graphics System, Version 2.0 Schrödinger, LLC.
4. Siloto, R.M.P, Weselake, R.J. Site saturation mutagenesis: Methods and applications in protein engineering *Biocat. Agric. Biotechnol.* 1 (2012)
5. DeSantis G., Wong K., Farwell B., Chatman K., Zhu Z., Tomlinson G., Huang H., Tan X., Bibbs L., Chen, P., Kretz K., Burk, M.J. Creation of a Productive, Highly Enantioselective Nitrilase through Gene Site Saturation Mutagenesis (GSSM) *J. Am. Chem. Soc.* (2003) 125, 38, 11476–11477
6. S-Y. Ku, K.A. Cornell, P.L. Howell Structure of Arabidopsis thaliana 5-methylthioribose kinase reveals a more occluded active site than its bacterial homolog *BMC Struct. Biol.* 7, (2007)
7. E.Y. Morgunova, A.M. Mikhailov, A.N. Popov, E.V. Blagova, E.A. Smirnova, B.K. Vainshtein, C. Mao, S.R. Armstrong, S.E. Ealick, A.A. Komissarov, E.V. Linkova, A.A. Burlakova, A.S. Mironov, V.G. Debabov Atomic structure at 2.5 Å resolution of uridine phosphorylase from *E. coli* as refined in the monoclinic crystal lattice *Febs Lett.* 367(2):183-7 (1995)
